1 **Title:** Functional diversity of brain networks supports consciousness and verbal  
2 intelligence.

3

4 **Authors:** Lorina Naci<sup>a\*</sup>, Amelie Haugg<sup>b</sup>, Alex MacDonald<sup>c</sup>, Mimma Anello<sup>d</sup>, Evan  
5 Houldin<sup>e</sup>, Shakib Naqshbandi<sup>f</sup>, Laura E. Gonzalez-Lara<sup>e</sup>, Miguel Arango<sup>f</sup>, Christopher  
6 Harle<sup>f</sup>, Rhodri Cusack<sup>a</sup>, Adrian M. Owen<sup>c</sup>

7

8 <sup>a</sup>Trinity College Institute of Neuroscience, Trinity College Dublin, Dublin, Ireland.

9 <sup>b</sup>Department of Psychiatry, Psychotherapy and Psychosomatics, Psychiatric Hospital,  
10 University of Zurich, Zurich, Switzerland.

11 <sup>c</sup>Faculty of Medicine, University of Toronto, Toronto, Canada.

12 <sup>d</sup>Schulich School of Medicine & Dentistry, Western University, London, Canada.

13 <sup>e</sup>Brain and Mind Institute, Western University, London, Canada.

14 <sup>f</sup>Department of Anesthesia and Preoperative Medicine, Schulich School of Medicine &  
15 Dentistry, Western University, London, Canada.

16 **\*Corresponding author:**

17 Lorina Naci

18 School of Psychology

19 Trinity College Institute of Neuroscience

20 Global Brain Health Institute

21 Trinity College Dublin, Dublin, Ireland

22 Telephone: +353 (0)87 688 5642

23 Email: [nacil@tcd.ie](mailto:nacil@tcd.ie)

24 **Abstract**

25 How are the myriad stimuli arriving at our senses transformed into conscious thought?  
26 To address this question, in a series of studies, we asked whether a common mechanism  
27 underlies loss of information processing in unconscious states across different conditions,  
28 which could shed light on the brain mechanisms of conscious cognition. With a novel  
29 approach, we brought together for the first time, data from the same paradigm—a highly  
30 engaging auditory-only narrative—in three independent domains: anesthesia-induced  
31 unconsciousness, unconsciousness after brain injury, and individual differences in  
32 intellectual abilities during conscious cognition. During external stimulation in the  
33 unconscious state, the functional differentiation between the auditory and fronto-parietal  
34 systems decreased significantly relatively to the conscious state. Conversely, we found  
35 that stronger functional differentiation between these systems in response to external  
36 stimulation predicted higher intellectual abilities during conscious cognition, in particular  
37 higher verbal acuity scores in independent cognitive testing battery. These convergent  
38 findings suggest that the responsivity of sensory and higher-order brain systems to  
39 external stimulation, especially through the diversification of their functional responses is  
40 an essential feature of conscious cognition and verbal intelligence.

41

## 42 **Introduction**

43 Understanding the brain mechanisms of conscious cognition is one of the great frontiers  
44 of cognitive neuroscience. A much-researched yet unresolved question is how the myriad  
45 sensory inputs arriving at our senses become integrated into meaningful representations  
46 that inform cognitive performance and give rise to individual differences in intellectual  
47 abilities. In the conscious brain, cognition is thought to arise from iterative interactions  
48 among brain regions of graded functional specialization. These include sensory-driven,  
49 e.g., auditory and visual, regions on one end of the functional hierarchy, and supramodal  
50 regions in frontal and parietal lobes that carry out higher-order cognition, such as  
51 executive function, on the other (1-3). However, to fully understand how the interactions  
52 of these widespread brain systems give rise to conscious information processing, it is  
53 necessary to factor out brain processes that are not intrinsic to consciousness (4). To this  
54 end, functional neuroimaging of individuals rendered unconscious under deep anesthesia  
55 or after severe brain injury provides a unique window for demarcating unconscious  
56 processes, and conversely, shedding light on brain mechanisms that are essential for  
57 conscious information processing and cognition in the healthy brain.

58

59 In a series of studies, we asked whether a common mechanism underlies loss of  
60 information processing in unconscious states across different conditions, which could  
61 shed light on the brain mechanisms of conscious cognition. To address this question we  
62 brought together, for the first time, data from the same paradigm—a highly engaging  
63 auditory-only narrative—in three independent domains: anesthesia-induced

64 unconsciousness, unconsciousness after brain injury, and individual differences in  
65 intellectual abilities during conscious cognition.  
66  
67 Despite a growing number of anesthesia studies, it remains unknown how loss of  
68 consciousness affects synthesis of information across sensory and higher-order brain  
69 systems. To date, the majority of functional Magnetic Resonance Imaging (fMRI) studies  
70 of anesthesia have investigated the brain during a task- and stimulus-free condition,  
71 known as the “resting” state, because behavioral responses and eye opening are impaired  
72 by sedation prior to loss of consciousness (5), which render traditional experimental  
73 paradigms that probe complex information processing impossible to implement.  
74 However, because resting state studies do not use sensory stimulation, they cannot shed  
75 light on how the synthesis of external information breaks down from loss of  
76 consciousness. Several studies have used simple psychophysical stimuli and, therefore,  
77 have limited their investigation to well-circumscribed responses in sensory-specific  
78 cortex (6). In the auditory domain, studies have used simple auditory stimuli to  
79 investigate the limits of auditory processing during anesthetic-induced sedation.  
80 Following light anesthesia with sevoflurane, activation to auditory word stimuli relative  
81 to silence was preserved in bilateral superior temporal gyri, right thalamus, bilateral  
82 parietal, left frontal, and right occipital cortices (7). Parallel results have been found with  
83 both propofol and the short-acting barbiturate thiopental, suggesting that basic auditory  
84 processing remains intact during reduced or absent conscious awareness (6, 8-10).  
85

86 By contrast, light anesthesia impairs more complex auditory processing (11-12). For  
87 example, one study (13) showed that the characteristic bilateral temporal-lobe responses  
88 to auditorily presented sentences were preserved during propofol- induced sedation,  
89 whereas ‘comprehension-related’ activity in inferior frontal and posterior temporal  
90 regions to ambiguous versus non-ambiguous sentences was abolished. However, this  
91 study did not achieve the unconscious state due to low anesthetic doses. Thus, to date, no  
92 anesthetic study has directly investigated how the loss of consciousness affects the  
93 processing of a complex, real-world narrative across sensory-driven and higher-order  
94 brain systems.

95

96 Another group of individuals—patients who lose consciousness after severe brain  
97 injury—stand to shed light on the brain mechanism affected by loss of consciousness.  
98 Following serious brain injury, a proportion of patients manifest disorders of  
99 consciousness (DoC) and exhibit very limited responsivity to commands administered at  
100 the bedside by the clinical staff. If entirely behaviorally non-responsive, they are thought  
101 to lack consciousness—be in a vegetative state (VS) (14)— or, if they have reproducible  
102 but inconsistent willful responses, to be in a minimal conscious state (MCS) (15). The  
103 clinical, behavioral assessment of behaviorally non-responsive patients is particularly  
104 difficult and can result in high misdiagnosis rate (41%) (16). Studies show that, despite  
105 the apparent absence of external signs of consciousness, a significant minority of patients  
106 (~19%) (17-19), thought to be in a VS, can demonstrate conscious awareness by willful  
107 modulation of their brain activity (20-26), a phenomenon captured by the recently  
108 proposed term ‘cognitive motor dissociation’ (CMD) (27). In the present study, to

109 circumvent the limitations of behavioral testing and ensure that patients categorized as  
110 unconscious showed no willful brain responses, each patient underwent an fMRI-based  
111 assessment with a previously established command-following protocol for detecting  
112 covert awareness (22, 28). Similarly to the deep anesthesia context, experimental  
113 paradigms that probe the processing of complex external information have, until recently,  
114 not been implemented in DoC patients (29-32). Although, the disrupted brain mechanism  
115 in patients who are genuinely unconscious has been studied in the resting state paradigm  
116 (33-39), this, by default, cannot help to elucidate fully the mechanisms underlying loss of  
117 information processing in severely brain-injured unconscious patients.

118

119 The inherent limitations in testing unconscious individuals and the absence of identical  
120 sensory stimulation paradigms in anesthesia and severe brain injury investigations has  
121 hindered understanding of common mechanisms underlying loss of information  
122 processing across these conditions. To address this knowledge gap, in two different  
123 studies, we used the same paradigm and a novel approach (30) for measuring complex  
124 information processing in unconsciousness from deep anesthesia and severe brain injury,  
125 as participants freely listened to richly evocative stimulation in the form of a plot-driven  
126 narrative—a brief (5 minute) auditory-only excerpt from the kidnapping scene in the  
127 movie ‘Taken’. This approach circumvents traditional limitations by requiring neither  
128 behavioral response nor eye opening, and, importantly, elicits both sensory and fronto-  
129 parietal brain responses that are known to support high-order cognition, such as executive  
130 function (40-47). By their very nature, engaging narratives are designed to give listeners  
131 a common conscious experience driven, in part, by the recruitment of similar executive

132 processes, as each listener continuously integrates their observations, analyses and  
133 predictions, while filtering out any distractions, leading to an ongoing involvement in the  
134 story's plot. We have previously shown (30-32) that when different individuals freely  
135 listen to the same narrative, stereotyped changes of brain activity across these frontal and  
136 parietal cortical regions are observed, which reflect a robust and similar recruitment of  
137 executive function across different individuals. Thus, this paradigm is particularly suited  
138 for investigating the extent of information processing in behaviorally non-responsive  
139 individuals in unconscious states.

140

141 Conversely, we asked whether the principles of information processing revealed by the  
142 anesthesia and severe brain-injury studies could predict conscious cognitive performance,  
143 an independent domain that relies on continuously efficient processing of external  
144 information. Understanding individual differences in intellectual abilities is profoundly  
145 important as it may, in the future, help facilitate their enhancement, yet the underlying  
146 brain mechanisms remain poorly understood. Previous studies have suggested that  
147 functional connectivity within the fronto-parietal network during executive or cognitive  
148 tasks is related to individual differences in intelligence (40). This approach has been  
149 useful in identifying functionally segregated neural correlates of intelligence, i.e., the  
150 fronto-parietal network, but it does not reflect the role of sensory-driven networks or of  
151 their interactions with higher-order systems.

152

153 In the first study, we asked how information processing across the auditory and fronto-  
154 parietal systems during the story was affected by loss of consciousness in deep anesthesia

155 in healthy participants (N=16). In the second study, we tested whether the insights  
156 gleaned from the anesthesia study could generalize to loss of consciousness after severe  
157 brain injury, in a group of patients (N=11) with disorders of consciousness that  
158 underwent fMRI scanning during the same audio story as healthy participants from study  
159 one. In the third study, we investigated how the cognitive performance of the individuals  
160 from the anesthesia study (N=14) independently-measured with a cognitive battery weeks  
161 after the sedation study related to their synthesis of complex sensory information between  
162 auditory and fronto-parietal systems during the audio-story task.

163

## 164 **Results**

### 165 **Information processing under deep anesthesia**

166 To measure information processing during the story, we adopted a previously established  
167 method using the same audio story (30), where we showed that the extent of stimulus-  
168 driven cross-subject correlation provided a measure of regional stimulus-driven  
169 information processing (Figure 1A–C). In the wakeful condition of the anesthesia study,  
170 we observed widespread and significant ( $p < 0.05$ ; FWE cor) cross-subject correlation  
171 between healthy participants within sensory-driven (primary and association) auditory  
172 cortex, as well as higher-order frontal and parietal regions (Figure 1D), consistent with  
173 Naci et al. (2017) (30). By contrast, in deep anesthesia, the significant ( $p < 0.05$ ; FWE cor)  
174 cross-subject correlation was limited to the auditory cortex, with the exception of two  
175 small clusters in left prefrontal and right parietal cortex (Figure 1E), suggesting that the  
176 processing of sensory information was preserved in the sensory, but almost entirely  
177 abolished in fronto-parietal regions.



178

179 Figure 1. Brain-wide inter-subject correlation of neural activity during the audio story

180

181 Subsequently, we investigated the impaired brain mechanism underlying loss of  
182 information processing in these higher-order regions. Current theories of consciousness  
183 (48-50), such as the Integrated Information Theory (IIT), propose that conscious  
184 cognition relies on the brain's capacity to efficiently integrate information across  
185 different specialized systems (48), suggesting that both interconnectedness and functional  
186 differentiation of brain systems are important for information processing. However,  
187 different putative mechanisms are consistent our results, including reduced/abolished  
188 connectivity among distinct brain systems (49) and loss of functional differentiation (48)  
189 (i.e., homogeneous connectivity across them). To directly investigate the underlying  
190 mechanism, we distinguished four possible impairment patterns consonant with theories  
191 of consciousness that could explain impaired information processing in deep anesthesia:  
192 1) a loss of long-range connectivity between auditory and fronto-parietal networks  
193 (Figure 2A); 2) a loss of connectivity between areas within each network, e.g., between  
194 frontal and parietal regions (Figure 2B); (3) a combination of 1 and 2 (Figure 2C); and,  
195 (4) a loss of differentiation between auditory and fronto-parietal networks (Figure 2D).

196

197 Figure 2. Candidate patterns of connectivity perturbations by deep propofol anesthesia

198

## 199 **The global effect of anesthesia on brain networks' connectivity**

200 Initially, we investigated how deep propofol anesthesia perturbed the patterns of global  
201 connectivity. During the audio story, a two-way ANOVA with factors connectivity type  
202 (within, between) and state (wakeful, deep anesthesia) showed that connectivity across  
203 networks increased significantly (main effect of state:  $F(16)=8.57$ ;  $p=0.01$ ) (Figure 3A–  
204 B) in deep anesthesia relative to wakefulness. Connectivity *between* increased more than  
205 *within* networks (interaction effect, state x connectivity type:  $F(15)=5.58$ ;  $p<0.05$ ) (Figure  
206 3E), driven by a significant increase in the *between* network connectivity ( $t(15)=3.82$ ,  
207  $p<0.005$ ) and no overall change in the *within* connectivity (see SI for complete results;  
208 Figure S3, S4). By contrast, during the resting state, deep anesthesia showed the opposite  
209 effect on between and within network connectivity, with a larger impact on the *within*  
210 relative to *between* network connectivity (interaction effect, state x connectivity type:  
211  $F(15)=5.4$ ;  $p<0.05$ ) (Figure 3C–D). Connectivity *within* was significantly reduced, but no  
212 changes were observed in deep anesthesia in the *between* network connectivity (see SI for  
213 complete results).

214

215 A direct comparison between the audio story and resting state confirmed that anesthesia  
216 affected connectivity in the two conditions in opposite directions. A two-way ANOVA  
217 with factors condition (audio story, resting state) and state (wakeful, deep anesthesia)  
218 showed a condition x state interaction [ $F(15)=7.01$ ;  $p<0.05$ ] that was driven by an overall  
219 connectivity reduction during the resting state and connectivity increase during the audio  
220 story in deep anesthesia. The effects were the same when functional differentiation was  
221 measured as the ratio of *between-* to *within-*network connectivity.

222

223 These suggest that, when the brain is at rest, reduced connectivity within brain networks  
224 rather than loss of functional differentiation between them, characterizes the unconscious  
225 state. By contrast, when the brain is exposed to complex naturalistic stimuli from the  
226 environment, reduced functional differentiation between brain networks leads to loss of  
227 information processing in the unconscious state. However, these results must be  
228 interpreted with caution, in light of the consistent block order in deep sedation.

229

230 Figure 3. Global *within*- and *between*-network connectivity perturbations by deep  
231 propofol anesthesia

232

### 233 **The effect of anesthesia on auditory and fronto-parietal networks' connectivity**

234 Next, we asked specifically whether reduced functional differentiation between the  
235 auditory and fronto-parietal networks drove the loss of information processing in the  
236 fronto-parietal regions during the story. Consistent with effects at the whole-brain level,  
237 we found a significant increase in the AUD–DAN and AUD–ECN connectivity  
238 [ $t(15)=2.6$ ,  $p<0.05$ ;  $t(15)= 4.98$ ,  $p<0.0005$ , respectively] (Figure 4A–D), or a significant  
239 reduction of the functional differentiation between the AUD and DAN, ECN in deep  
240 anesthesia relative to wakefulness. By contrast, in the resting state, connectivity between  
241 these networks was not affected by sedation (Figure 3). These results suggested that  
242 reduced functional differentiation between the auditory and fronto-parietal networks  
243 leads to loss of external information processing in the unconscious state. Conversely, they

244 suggested that the functional differentiation between the auditory and fronto-parietal  
245 networks underlies conscious processing of complex auditory information.

246

247 Figure 4. Perturbations of auditory and fronto-parietal connectivity by deep propofol  
248 anesthesia in the audio story condition

249

250 To test specifically whether functional differentiation in the conscious state would be  
251 driven by the complex features of the audio story, including its narrative, rather than  
252 merely the presence of external stimulation, we compared the AUD–DAN and AUD–  
253 ECN pairwise connectivity in wakeful individuals during the audio story with those in the  
254 two baseline conditions, a scrambled version of the story that retained the sensory  
255 features but was devoid of the narrative, and the resting state. During the intact audio  
256 story, functional connectivity between the AUD and DAN, ECN was significantly lower  
257 than in the scrambled story [AUD–DAN:  $t(14)=-11.2$ ,  $p<0.0001$ ; AUD–ECN:  $t(14)=-$   
258  $10.62$ ,  $p<0.0001$ ], and than in the resting state [AUD–DAN:  $t(14)=-7.3$ ,  $p<0.0001$ ; AUD–  
259 ECN:  $t(14)=-2.7$ ,  $p<0.05$ ] (Figure 5A–H). These results suggested that the processing of  
260 the high-order features of story, including its narrative, drove functional differentiation  
261 between the auditory and fronto-parietal networks in wakeful individuals.

262

263 Figure 5. Functional connectivity between the auditory and fronto-parietal networks in  
264 healthy wakeful individuals, during the audio story and baseline conditions

265

266 **The effect of severe brain injury on the auditory and fronto-parietal networks'**  
267 **connectivity**

268 Results from both conscious and unconscious conditions in the previous study suggested  
269 that functional differentiation between the auditory and fronto-parietal networks  
270 underlined conscious processing of complex auditory information. In the next study, we  
271 further tested this claim in severe brain-injury, which served as an independent  
272 manipulation of consciousness.

273

274 The structural profiles and full behavioral description of the convenience sample of brain-  
275 injured patients (N=11) are shown in Figure S1, Table S2, S3. Patients who showed  
276 willful brain responses in the independent command-following assessment (22, 28) were  
277 considered covertly aware and labeled DoC+ (N=6), and those who showed no signs of  
278 conscious awareness were labeled as DoC- (N=5) (Figure 6), for subsequent analyses.  
279 Similarly to conscious individuals (Figure 5), we expected DoC+ patient group to show a  
280 heightened differentiation/down-regulation of the AUD and DAN, ECN pairwise  
281 connectivity during the audio story relative to resting state baseline connectivity. By  
282 contrast, we did not expect a down-regulation of the connectivity between these networks  
283 during the audio story in DoC- patient group.

284

285 The DoC+ group showed a significant down-regulation of the auditory and fronto-  
286 parietal networks connectivity in the audio story relative to the resting state [AUD–DAN  
287 :  $t(5)=-1.9$ ,  $p=0.05$ ; AUD–ECN:  $t(5)=-3.6$ ,  $p<0.5$ ] (Figure 7A–H, E–L), and was  
288 significantly different from the DoC- (N=5) group, who did not show this effect (Figure

289 7C–J, E–L) [AUD–DAN:  $t(8)=-3.6$ ,  $p<0.01$ ; AUD–ECN:  $t(9)=-3.4$ ,  $p<0.01$ ]. The  
290 predicted effect pattern was also observed for individual patients, with 5/6 DoC+ patients  
291 showing a down-regulation of the connectivity between AUD and DAN, ECN (Figure  
292 7F, L). The effect in the DoC+ group was consistent with the effect observed in healthy  
293 conscious individuals (Figure 5). By contrast, the DoC- group showed significantly  
294 enhanced AUD–DAN connectivity during the audio story relative to resting state  
295 [ $t(4)=4.48$ ;  $p<0.05$ ] (Figure 7E). This was consistent with the up-regulation of the AUD–  
296 DAN connectivity observed in the anesthesia-induced unconscious state in the previous  
297 study.

298

299 Figure 6. Summary of DoC patients' clinical and fMRI assessment data

300

301 Figure 7. Modulation of auditory to fronto-parietal connectivity by meaningful

302 stimulation in DoC patients

303

### 304 **Network connectivity and individual differences in conscious cognition**

305 Taken together, the results from the two previous two studies suggested that heightened

306 differentiation between the auditory and fronto-parietal networks supports conscious

307 processing of complex auditory information, and more broadly, conscious cognition. In

308 the third study, we further tested this claim directly, by asking whether it predicted

309 individual differences in cognitive performance. We assessed the cognitive performance

310 of a participant subset (14/16) from the anesthesia study, who came back to the

311 laboratory weeks later, with a battery comprising 12 cognitive tests (51) that measured

312 short-term memory, reasoning, and verbal acuity (SI, Table S4). Based on converging  
313 results from studies 1 and 2, we expected stronger differentiation between the auditory  
314 and fronto-parietal networks during the audio story to predict stronger cognitive  
315 performance, or, a negative relationship between the AUD and DAN, ECN connectivity  
316 and the independently measured cognitive performance in the same individuals.

317

318 The individuals' AUD–DAN connectivity during the audio story was significantly  
319 negatively correlated ( $r = -0.66$ ;  $p < 0.05$ ) with their cognitive performance in the verbal  
320 acuity (Figure 8 A–B) component of the battery, which accounted for the variance of  
321 tasks that used verbal stimuli (i.e., digit span, verbal reasoning, color-word remapping;  
322 Supporting Information). The AUD–DAN connectivity did not predict performance in  
323 the other two components, and the AUD–ECN connectivity did not predict performance  
324 in any of the three (Figure 8A, C). Pairwise connectivity between these networks in the  
325 resting state did not predict cognitive performance in any of the domains (Figure 8A).  
326 Further, we found no relationship between the connectivity of the AUD and default mode  
327 network (DMN), included as a control high-order network, and cognitive performance.

328

329 In summary, the results of the third study converged with the other two, and suggested  
330 that the extent to which the functional responses of the auditory and fronto-parietal  
331 networks to complex auditory stimuli dissociated from one another predicted independent  
332 cognitive performance in the verbal domain, and thus, may be a determining factor in  
333 individual differences in verbal acuity.

334

335 Figure 8. The relationship between network connectivity during the audio story and  
336 independently-measured cognitive performance.

337

338

### 339 **Discussion**

340 In a series of studies, we asked whether a common mechanism underlies loss of  
341 information processing in unconscious states across different conditions, which could  
342 shed light on the brain mechanisms of conscious cognition. To this end, for the first time,  
343 we brought together two very disparate conditions where consciousness is lost—deep  
344 anesthesia and severe brain injury—to investigate the modulation of functional  
345 connectivity between the auditory and fronto-parietal networks by identical complex  
346 stimulation in identical paradigms. Subsequently, we tested whether findings from these  
347 studies predicted individual differences in intellectual abilities during conscious  
348 information processing.

349

### 350 **Common mechanism for loss of information processing in unconsciousness during** 351 **anesthesia and after severe brain injury**

352 We use a novel approach (30-32), to measure external information processing in response  
353 to richly evocative stimulation portraying real-world events, during deep anesthesia and  
354 severe brain injury. In the anesthesia study, we found that the processing of the story  
355 information was preserved in auditory cortex, but almost entirely abolished in fronto-  
356 parietal regions. Deep anesthesia led to a significant reduction in the functional  
357 differentiation of several networks across the brain, and specifically, between the



358 auditory and fronto-parietal networks, during the story condition. These results suggested  
359 that anesthesia impaired the processing of complex external information in fronto-parietal  
360 regions by eroding their functional differentiation from sensory (e.g., auditory) systems,  
361 and not by impairing connections between or within them. Propofol was used here as a  
362 common anesthetic agent, and future studies that employ the same paradigm across  
363 different agents will help elucidate whether specific agents vary in their effect on  
364 connectivity during complex stimulation. Our results are consistent with previous  
365 findings from resting state studies, suggesting that anesthesia reduces the repertoire of  
366 discriminable brain states (52-53), and that during loss of consciousness global synchrony  
367 impairs information processing by leading to a breakdown of causal interactions between  
368 brain areas (54-56). Further, they are consistent with resting state studies using sleep-  
369 induced altered states of consciousness, which show that hyper-synchrony perturbs the  
370 feed-forward propagation of auditory information (57), as well as feedback projections  
371 (58), and more broadly, the stable patterns of causal interactions in response to external  
372 stimulation across the brain (59). While these previous resting state studies suggest that  
373 global synchrony breaks down causal interactions, the investigation of causal cortico-  
374 cortical interactions was outside the scope of this work. We did not find an effect of deep  
375 sedation on thalamo-cortical connectivity in any of the five brain networks (SI), and  
376 while outside of our scope here, a potential causal role of thalamic inputs to cortico-  
377 cortical connectivity in deep sedation remains to be investigated further.

378

379 Our findings from the resting state condition in deep anesthesia manipulation agree with  
380 a previously reported reduction of brain connectivity in deep propofol anesthesia during

381 the resting state (49, 54, 60), in particular with a reduction of connectivity *within* the  
382 default-mode 60-62; but, see 53, 63), and the executive control networks (60, 64).  
383 Although consistency with previous studies suggests otherwise, we note that differences  
384 between the story and resting state conditions in deep sedation must be interpreted with  
385 caution, in light of the consistent block order. Nevertheless, the results from the sensory  
386 stimulation condition reveal a different mechanism underlying the loss of external  
387 information processing than suggested by resting state studies. First, in the audio-story  
388 condition, the connectivity within networks was affected by sedation in the opposite  
389 direction to the resting state. Second, in the resting state condition, we observed no effect  
390 of deep anesthesia on connectivity *between* distinct networks, which, by contrast,  
391 increased significantly during the auditory stimulation condition suggesting loss of  
392 functional differentiation across the cortex. Another type of stimulation—transcranial  
393 magnetic stimulation (TMS)—has previously been used to directly perturb the cortex in  
394 unconscious states and demonstrate that responses across the cortex become  
395 undifferentiated from one another (55, 65). In summary, these results suggest that deep  
396 anesthesia affects the brain differently when it is exposed to complex external stimulation  
397 relative to rest, with the stimulus-evoked feed-forward processing cascade being echoed  
398 undifferentiated throughout the brain, thus overcoming the inhibitory effect of propofol  
399 on neural connectivity that has been reported in resting state studies (66).  
400  
401 Similarly to deeply anesthetized unconscious individuals, severely brain-injured patients  
402 who were not consciously aware during the study showed significantly reduced  
403 differentiation between the auditory and fronto-parietal networks during the story relative

404 to their resting baseline. Conversely, similarly to healthy wakeful individuals, severely  
405 brain-injured patients who were covertly aware showed the opposite effect: significantly  
406 enhanced differentiation between the auditory and fronto-parietal networks during the  
407 story relative to their resting baseline. The modulation of the sensory to higher-order  
408 networks' relationship by meaningful environmental stimuli in severely brain-damaged  
409 (albeit conscious), patients suggests this is a fundamental feature of conscious processing  
410 that is resilient to substantial metabolic dysfunction following brain injury (67). We  
411 caution that our results do not suggest that each DoC+ patient understood the story  
412 similarly as healthy individuals. Brain-injured patients fluctuate vastly in arousal and,  
413 thus, even if individual DoC+ patients discussed here retained functional brain  
414 architecture to support covert conscious awareness, the absence of a sensory baseline and  
415 individual-level statistics, render it impossible to ascertain the extent of understanding in  
416 individual patients.

417

418 Previous studies that have compared anesthetized and unconscious brain-injured patients  
419 have highlighted that, similarly to the effect of common anesthetic agents including  
420 propofol (60, 68), brain dysfunction in this population is prevalent within the fronto-  
421 parietal network (69-70). They have indicated preserved sensory processing (e.g.,  
422 responses to noxious stimulation, auditory or speech perception) in the absence of higher-  
423 order components (e.g., neural evidence of pain perception, language comprehension)  
424 (5), and suggested that disconnection between sensory and fronto-parietal systems is  
425 common to both populations. By contrast, our findings suggest that, when the brain is  
426 exposed to complex external information, these systems do not disconnect from one

427 another in these unconscious states, as previously suggested by aforementioned resting  
428 state studies. Rather, our findings demonstrate that the erosion of functional  
429 differentiation among these systems underlies impaired information processing when  
430 consciousness is lost.

431

432 Although loss of consciousness is common to both deeply anesthetized and some severe  
433 brain-injured patients, these two populations differ greatly. In the former no structural  
434 changes occur, and the functional brain response is altered pharmacologically. In the  
435 latter, an array of structural damage, greatly varying across patients, is present and affects  
436 altered brain responses, leading to complete functional loss in some domains and  
437 potential functional re-organization and preservation in others. Given the large  
438 differences between these two, the similarity of the functional response to previously  
439 validated targeted stimulation (30) across these populations provides strong evidence for  
440 a common mechanisms underlying loss of information processing in the unconscious  
441 state. These results are consistent with current theories of consciousness, which suggest  
442 that it requires both differentiation and integration of information in neural circuits (48,  
443 54, 71), and elucidate the underlying brain mechanism by showing the critical role of  
444 functional differentiation between sensory and higher-order systems when information  
445 processing is required.

446

#### 447 **Mechanism for conscious information processing and cognition**

448 The third study further confirmed the role of the functional differentiation between the  
449 sensory and higher-order systems in conscious cognition. Individuals who showed higher

450 differentiation between the auditory and dorsal attention network (DAN) in response to  
451 the audio story had higher verbal acuity scores than individuals who showed lower  
452 differentiation. The story elicited a range of cognitive processes such as the orientation  
453 and modulation of attention to the saliency of incoming auditory inputs— a function  
454 subserved primarily by the DAN (72) — and language perception and comprehension,  
455 which corresponded to those engaged by the verbal acuity tasks of the cognitive battery.  
456 The functional relationship between the auditory and executive control network (ECN)  
457 was not predictive of cognitive performance, which is likely accounted for by the nature  
458 of the stimulus and fMRI paradigm which did not require behavioral response planning  
459 or monitoring— a function sub-served primarily by the ECN (73). There was no  
460 relationship between the auditory and fronto-parietal connectivity in response to the story  
461 and performance in the short-term memory or reasoning components of the cognitive  
462 battery, likely due to the story’s cognitive demands low loading on these components.  
463 We note that the verbal component of the cognitive battery, which comprised 12 tasks,  
464 accounted for the majority of variance in a subset of different tasks that used verbal  
465 stimuli (digit span, verbal reasoning, color-word remapping; full description in SI). Thus,  
466 in capturing a cross-section of processes employed in these different tasks, the verbal  
467 component represented a robust example of varied domain-specific processes, which are  
468 abstracted away from the demands of particular tasks. Therefore, although these results  
469 suggested that the relationship between brain connectivity and intelligence is domain-  
470 specific, future studies are required to further test the sensory–higher-order networks’  
471 relationship and other cognitive domains/processes.  
472

473

474 Further, these results agree with a previous proposal that the relationship between brain  
475 connectivity and intelligence is context specific (74). In contrast to the a-priori predicted  
476 relationship between these networks' connectivity and intelligence during complex  
477 sensory stimulation, we found no relationship between them in the resting state. Notably,  
478 these results were predicted from two different populations where loss of from  
479 information in unconsciousness suggested a common mechanism for information  
480 processing during conscious cognition. Consistent with a recent emerging view in the  
481 field (75), they suggested that individual differences in intellectual abilities rely on the  
482 dynamic reconfigurations of connectivity in response to incoming sensory information,  
483 within a widespread system comprising sensory-specific and extra-modal cortices in  
484 fronto-parietal cortex.

485

486 In summary, findings herein suggest that the dissolution of functional differentiation  
487 is a common basis for loss of information processing across widely different conditions  
488 where consciousness is lost. Conversely, they suggest that the responsivity of sensory and  
489 higher-order brain systems to naturalistic external stimulation, especially through the  
490 diversification of their functional responses is an essential feature of conscious cognition  
491 and domain-specific intelligence.

492

## 493 **Material and Methods**

### 494 **Participants**

495 Ethical approval was obtained from the Health Sciences Research Ethics Board and  
496 Psychology Research Ethics Board of Western University. All experiments were  
497 performed in accordance with the relevant guidelines and regulations set out by the  
498 research ethics boards. All healthy volunteers were right-handed, native English speakers,  
499 and had no history of neurological disorders. The respective substitute decision makers  
500 gave informed written consent for each patient's participation. They signed informed  
501 consent before participating and were remunerated for their time. 19 (18–40 years; 13  
502 males) healthy volunteers, 11 (19–55 years; 5 males) DoC patients, and 14 (18–40 years;  
503 12 males) healthy volunteers participated in study 1, 2, and 3, respectively. Three  
504 volunteers (1 male) were excluded from data analyses of study 1, due to headphone  
505 malfunction or physiological impediments to reaching deep anesthesia in the scanner.

506

### 507 **Stimuli and Design**

508 In study 1, a plot-driven audio story (5 minutes) was presented in the fMRI scanner to  
509 healthy volunteers and they were asked to simply listen with their eyes closed. A resting  
510 state scan (8 minutes) was also acquired, during which volunteers were asked to relax  
511 with their eyes closed and not fall asleep. A novel re-analysis of data from the scrambled  
512 story condition from Naci et al. (2017) (30) (SI) was performed, as a baseline condition  
513 with the intact audio story. In study 2, severely brain-injured patients were scanned as  
514 they listened to the same audio story as healthy volunteers, and also during the resting  
515 state. In study 3, 14/16 of volunteers from the anesthesia study completed a cognitive

516 battery comprising 12 tasks based on classical cognitive psychology paradigms  
517 ([www.CambridgeBrainSciences.com](http://www.CambridgeBrainSciences.com)) (SI). The stimuli and design for each were reported  
518 in Hampshire et al. (2012) (51).

519

## 520 **Sedation procedure**

521 fMRI data was acquired during the audio story and resting state conditions while  
522 participants were awake (non-sedated) and deeply anesthetized with propofol (Ramsay  
523 score 5) (76). Prior to acquiring fMRI data for the wakeful and deeply anesthetized states,  
524 3 independent assessors (two anesthesiologists and one anesthesia nurse) evaluated each  
525 participant's Ramsay level by communicating with them in person inside the fMRI  
526 scanner room, as follows. *Awake Non-sedated*. Volunteers were fully awake, alert and  
527 communicated appropriately. For the wakeful session, they were not scored on the  
528 Ramsay sedation scale, which is intended for patients in critical care settings or patients  
529 requiring sedation. During the wakeful audio story and resting state conditions,  
530 wakefulness was monitored with an infrared camera placed inside the scanner. *Deep*  
531 *anesthesia*. Intravenous propofol was administered with a Baxter AS 50 (Singapore). We  
532 used an effect-site/plasma steering algorithm in combination with the computer-  
533 controlled infusion pump to achieve step-wise increments in the sedative effect of  
534 propofol. The infusion pump was manually adjusted to achieve desired levels of sedation,  
535 guided by targeted concentrations of propofol, as predicted by the TIVA Trainer (the  
536 European Society for Intravenous Anaesthesia, [eurosiva.eu](http://eurosiva.eu)) pharmacokinetic simulation  
537 program. The pharmacokinetic model provided target-controlled infusion by adjusting  
538 infusion rates of propofol over time to achieve and maintain the target blood



539 concentrations as specified by the Marsh 3 (77) compartment algorithm for each  
540 participant, as incorporated in the TIVA Trainer software. Propofol infusion commenced  
541 with a target effect-site concentration of 0.6  $\mu\text{g/ml}$  and oxygen was titrated to maintain  
542 SpO<sub>2</sub> above 96%. If Ramsay level was lower than 5, the concentration was slowly  
543 increased by increments of 0.3  $\mu\text{g/ml}$  with repeated assessments of responsiveness  
544 between increments to obtain a Ramsay score of 5. Once participants stopped responding  
545 to verbal commands, were unable to engage in conversation, and were rousable only to  
546 physical stimulation they were considered to be at Ramsay level 5. The mean estimated  
547 effect-site propofol concentration was 2.48 (1.82- 3.14)  $\mu\text{g/ml}$ , and the mean estimated  
548 plasma propofol concentration was 2.68 (1.92- 3.44)  $\mu\text{g/ml}$ . Mean total mass of propofol  
549 administered was 486.58 (373.30- 599.86) mg. The variability of these concentrations  
550 and doses is typical for studies of the pharmacokinetics and pharmacodynamics of  
551 propofol (SI). For both sessions, prior to the scanning, volunteers were asked to perform  
552 a basic verbal recall memory test and a computerized (4 minute) auditory target detection  
553 task (SI), which further assessed each individual's wakefulness/deep anesthesia level  
554 independently of the anesthesia team. Scanning commenced only once the agreement  
555 among the 3 anesthesia assessors on the Ramsey level 5 was consistent with the lack of  
556 response in both verbal and computerized behavioral tests.

557

558 Scanning took place in a research not hospital setting, thus, breathing in the deeply  
559 anesthetized individuals could not be protected by intubation and was kept under  
560 spontaneous individual control. Therefore, although individuals were monitored closely  
561 by two anesthesiologists, airway security was at risk during scanning and time inside the

562 scanner was kept at the minimum to ensure return to normal breathing. Thus, safety  
563 concerns for the deeply anesthetized individuals dictated that the novel condition of the  
564 naturalistic audio story be presented first. The baseline condition of the resting state was  
565 considered of secondary importance, as it has been reported previously in deep sedation  
566 condition of clinical studies. Therefore, this condition was acquired after the story  
567 condition across participants. However, the mean estimated effect-site propofol  
568 concentration and the mean estimated plasma propofol concentrations were kept stable by  
569 the pharmacokinetic model delivered via the TIVA Trainer infusion pump throughout the  
570 deep sedation session, and the lack of significant differences in the frame-wise movement  
571 parameters (assessed according to Power et al. (2012))(78) between the story and the  
572 resting state conditions further suggested no difference in the level of sedation between  
573 the two conditions. For similar safety reasons, data on the meaningless baseline  
574 (scrambled version of the audio story) that was designed to clarify processing  
575 mechanisms in wakeful individuals, was not collected in deeply anesthetized individuals.  
576 Throughout the deep sedation scanning session, the participant's behavioral profile was  
577 monitored inside the scanner room by the anesthesia nurse and one of the  
578 anesthesiologists and outside from the scanner control room, with an infrared camera that  
579 displayed the participant's face. No movement, fluctuations of sedation, or any other state  
580 change, was observed during the deep sedation scanning for any of the participants  
581 included in the study.

582

583 **Patients**

584 The severely brain-injured patients were selected based on their clinical diagnoses (i.e.,  
585 VS/MCS/LIS, at the time of fMRI data acquisition) to form a convenience sample of the  
586 disorders of consciousness (DoC) population. No previous fMRI data was available for  
587 any of the patients at the time of scanning. Prior to commencing the scanning sessions, all  
588 VS/MCS patients were tested behaviorally at their bedside (outside of the scanner) with  
589 the Comma Recovery Scale-Revised (CRS-R) (79). At the bedside behavioral testing, six  
590 patients met the recognized criteria for the vegetative state (VS), four for the minimally  
591 conscious state (MCS), and one for the locked-in syndrome (LIS) (full description of  
592 behavioral scores in Table S3). LIS describes an individual who, as a result of acute  
593 injury to the brain stem, has (almost) entirely lost the ability to produce motor actions,  
594 apart for small, but reproducible eye movements that confirm the presence of  
595 consciousness (80). The patients' demographic and clinical data are summarized in Table  
596 S2, S3, and the structural, functional MRI assessment data in Figures 6, S1, S5, S6.

597

598 Inside the scanner, each patient underwent a previously established fMRI-based protocol  
599 for assessing auditory perception and detecting covert awareness (22, 28) (Figure 6,  
600 Figure S5), in the same visit as the audio story scan to help establish the genuine status of  
601 consciousness. Prior to assessing command-following, we assessed auditory perception to  
602 ensure that it could not have been a limiting factor to producing willful brain responses.  
603 Patients had complex underlying medical states, including head flexion and overall  
604 muscle rigidity, tracheal tubes for assisted feeding and suctioning, etc., and the highly  
605 physically constraining scanning environment compromised their comfort. Some could

606 not lie flat for long periods, others needed frequent suctioning, and other still became  
607 agitated after an initial brief period in the scanner. Therefore, to limit patient discomfort,  
608 time in the scanner was kept at a minimum and data on the meaningless baseline  
609 (scrambled version of the audio story) was not collected.

610

### 611 **fMRI Acquisition and Analysis**

612 *Healthy individuals.* Functional images were acquired on a 3 Tesla Siemens Tim Trio  
613 system, with a 32-channel head coil. Standard preprocessing procedures and data  
614 analyses were performed with SPM8 and the AA pipeline software (81). In the  
615 processing pipeline, a temporal high-pass filter with a cut-off of 1/128 Hz was applied  
616 and movement was accounted for by regressing out the 6 motion parameters (x, y, z, roll,  
617 pitch, yaw). Additionally, frame-wise movement parameters according to Power et al.  
618 (2012) (78) were computed. Prior to analyses, the first five scans of each session were  
619 discarded to achieve T1 equilibrium and to allow participants to adjust to the noise of the  
620 scanner. To avoid the formation of artificial anti-correlations, a confounding effect  
621 previously reported by Murphy and others (82-83), we performed no global signal  
622 regression. Group-level correlational analyses explored, for each voxel, the inter-subject  
623 correlation in brain activity, by measuring the correlation of each subject's time-course  
624 with the mean time-course of all other subjects. Significant clusters/voxels survived the  
625  $p < 0.05$  threshold, corrected for multiple comparisons with the family wise error (FWE).  
626 Functional connectivity (FC) was measured by computing via Pearson correlation the  
627 similarity of the fMRI time-courses of regions of interest (ROI)—based on well-  
628 established landmark ROIs from the resting state literature (84) (Table S1)—*within* and

629 *between* different networks (85) (SI). As this measure of connectivity reflected the degree  
630 of similarity between the networks' functional time-courses, an increase/up-regulation of  
631 connectivity indicated more similar time-courses between networks, and thus a loss of  
632 functional differentiation. Thus, 'differentiation' in this context is measured as the  
633 inverse of the Pearson correlation value and must not be confused with measures used in  
634 other approaches (48). We note that Pearson correlation is a simple FC measure that,  
635 while advantageous for its minimal assumptions regarding the true nature of brain  
636 interactions and breadth of its use in the neuroscientific literature, does not directly imply  
637 causal relations between neural regions. However, it is an adequate measure of FC for our  
638 purposes, because the time-course and spatial extent of the auditory and fronto-parietal  
639 networks encompassed a vast swath of the hierarchical processing cascade and, thus,  
640 many regions of cause-effect space were triggered by the stimulus. Their FC, as  
641 measured through Pearson correlation, reflected their interactions over the several  
642 minutes and the resulting computations on the information content of the auditory inputs.  
643 Future studies will also investigate the connectivity between these regions by using direct  
644 measures of causal relationships (86-87). T-tests used to explore effects of interest  
645 between functional connectivity and cognitive performance were Bonferroni corrected  
646 for multiple comparisons.

647

648 *Severely brain-injured patients.* Patient scanning was performed using the same 3 Tesla  
649 Siemens Tim Trio system, 32-channel head coil, and data acquisition parameters as for  
650 the healthy participants. The same data preprocessing and analyses procedures as for  
651 healthy participants were applied to patient data. The patients' spontaneous arousal

652 during the audio story condition was monitored with an infrared camera placed inside the  
653 scanner. One patient (P7) fell asleep in the scanner for the entirety of the session and  
654 thus, showed no neuroimaging evidence of awareness despite an MCS diagnosis. The  
655 extent of information processing in individual patients (Figure S6) was investigated with  
656 a novel technique developed by Naci and colleagues (30, 32). This approach did not  
657 involve normalization to a healthy template, nor did it constrain the patient's expected  
658 brain activity based on the localization of the effect in healthy controls. Instead, the time-  
659 course of brain activity in healthy controls served to build a strong prediction for the  
660 temporal evolution of brain activity in the patients. The precise location of a patient's  
661 brain activity was expected to deviate from that of the healthy controls'. Not only is this  
662 naturally the case for individual healthy participants, but also, importantly, it is to be  
663 expected in brain-injured patients as a result of structural and concomitant functional re-  
664 organization of the brain. Nevertheless, a spatial heuristic based on the controls' data  
665 informed the interpretation of the patients' results, helping to infer the nature of the  
666 underlying residual brain function. In summary, drawing comparisons in the temporal  
667 domain enabled direct relation of the healthy controls' activation to that of brain-injured  
668 patients, while avoiding stringent spatial constraints on the patients' functional anatomy  
669 (Figure S6). By contrast, for the analysis of functional connectivity based on a set of  
670 network nodes pre-defined in the healthy literature in the MNI standard neurological  
671 space, each patient's brain was normalized to the healthy template. We reasoned that any  
672 damage within the regions of interest in each patient's brain would add noise to the brain  
673 activity measurement and reduce the power to detect an effect. Therefore, any results in  
674 brain injured patients, that aligned with a-priori hypotheses based on the anesthesia study

675 were highly unlikely given the heterogeneous structural preservation and would present a  
676 conservative estimate of the underlying effect.

677 **Author Contributions**

678 Conceptualization, L.N.; Methodology, L.N., A.H., R.C.; Recruitment, E.H., A.M., M.A.,  
679 L.G.; Data Acquisition, L.N., E.H., A.M., M.A, S.N., M.A., C.H.; Formal Analyses, L.N.,  
680 A.H., E.H. R.C.; Writing, L.N.; Supervision, A.M.O.; Funding and resource acquisition,  
681 M.A., C.H., A.M.O.

682

683 **Acknowledgements**

684 We thank Dr. Conor Wild and Ms. Leah Sinai for their help with the scrambled audio  
685 stimulus generation and data acquisition, and Dr. Tim Bayne for his valuable feedback.  
686 This research was supported by the L'Oréal-Unesco for Women in Science Excellence  
687 Research Fellowship and the Wellcome Trust Institutional Strategic Support Fund to L.N.  
688 and a Canada Excellence Research Chair to A.M.O.

689

690 **Conflict of Interest**

691 The authors declare no conflict of interest.

692

693 **Data Availability Statement**

694 The datasets generated during and/or analysed during the current study are available from  
695 the corresponding author on reasonable request.

696

697



698 **References**

- 699 1. Dehaene, S., and Changeux, J.P. (2011). Experimental and theoretical approaches  
700 to conscious processing. *Neuron* 70 (2), 200-27.
- 701 2. Dehaene, S., Changeux, J., Naccache, L., Sackur, J., and Sergent, C. (2006).  
702 Conscious, preconscious, and subliminal processing: a testable taxonomy. *Trends*  
703 *In Cognitive Sciences* 10, 204-211.
- 704 3. Lamme, V. a F., and Roelfsema, P.R. (2000). The distinct modes of vision offered  
705 by feedforward and recurrent processing. *Trends Neurosci.* 23, 571–579.
- 706 4. Dehaene, S., Charles, L., King, J. R., and Marti, S. (2014). Toward a  
707 computational theory of conscious processing. *Curr. Opin. Neurobiol.* 25, 76–84.
- 708 5. MacDonald, A., Naci, L., MacDonald, P., and Owen, A.M. (2015). Anesthesia  
709 and neuroimaging: Investigating the neural correlates of unconsciousness. *TICS*  
710 19(2), 100–107.
- 711 6. Dueck, M.H. et al. (2005). Propofol attenuates responses of the auditory cortex to  
712 acoustic stimulation in a dose-dependent manner: A FMRI study. *Acta*  
713 *Anaesthesiol. Scand.* 49, 784–791.
- 714 7. Kerssens, C. et al. (2005). Attenuated brain response to auditory word stimulation  
715 with sevoflurane: a functional magnetic resonance imaging study in humans.  
716 *Anesthesiology* 103, 11-19.
- 717 8. Veselis, R.A. et al. (2004) Thiopental and propofol affect different  
718 regions of the brain at similar pharmacologic effects. *Anesth. Analg.*  
719 99, 399–408
- 720 9. Plourde, G. et al. (2006) Cortical processing of complex auditory

- 721 stimuli during alterations of consciousness with the general  
722 anesthetic propofol. *Anesthesiology* 104, 448–457
- 723 10. Liu, X. et al. (2012) Propofol disrupts functional interactions between  
724 sensory and high-order processing of auditory verbal memory. *Hum.*  
725 *Brain Mapp.* 33, 2487–2498
- 726 11. Heinke, W. et al. (2004) Sequential effects of propofol on functional  
727 brain activation induced by auditory language processing: an event-related  
728 functional magnetic resonance imaging study. *Br. J. Anaesth.*  
729 92, 641–650
- 730 12. Adapa, R.M. et al. (2014) Neural correlates of successful semantic  
731 processing during propofol sedation. *Hum. Brain Mapp.* 35, 2935–  
732 2949.
- 733 13. Davis, M.H. et al. (2007). Dissociating speech perception and comprehension at  
734 reduced levels of awareness. *Proc. Natl. Acad. Sci. USA* 104, 16032-16037.
- 735 14. The Multi-Society Task Force on PVS. (1994). Medical aspects of the persistent  
736 vegetative state. *New England Journal of Medicine* 330, 1499-1508.
- 737 15. Giacino, J.T., et al. (2002). The minimally conscious state: Definition and  
738 diagnostic criteria. *Neurology* 58(3), 349-353.
- 739 16. Schnakers, C., et al. (2009). Diagnostic accuracy of the vegetative and minimally  
740 conscious state: clinical consensus versus standardized neurobehavioral  
741 assessment. *BMC Neurology* 9(1), 35.

- 742 17. Kondziella, D., Friberg, C. K., Frokjaer, V. G., Fabricius, M., & Møller, K.  
743 (2015). Preserved consciousness in vegetative and minimal conscious states:  
744 systematic review and meta-analysis. *J Neurol Neurosurg Psychiatry*, jnnp-2015.
- 745 18. Cruse, D., Chennu, S., Chatelle, C., Bekinschtein, T. A., Fernández-Espejo, D.,  
746 Pickard, J. D., ... & Owen, A. M. (2012). Bedside detection of awareness in the  
747 vegetative state: a cohort study. *The Lancet*, 378(9809), 2088-2094.
- 748 19. Monti, M.M., et al. (2010). Willful modulation of brain activity in disorders of  
749 consciousness. *N. Engl. J. Med.* 362, 579–589.
- 750 20. Bodien, Y. G., Giacino, J. T., & Edlow, B. L. (2017). Functional MRI Motor  
751 Imagery Tasks to Detect Command Following in Traumatic Disorders of  
752 Consciousness. *Frontiers in Neurology*, 8, 688.
- 753 21. Gibson, R.M., et al. (2016) Somatosensory attention identifies both overt and  
754 covert awareness in disorders of consciousness. *Annals of Neurology*, In Press,  
755 doi: 10.1002/ana.24726.
- 756 22. Naci, L., and Owen, A.M. (2013). Making every word count for nonresponsive  
757 patients. *JAMA Neurol.* 70, 1235–41.
- 758 23. Chennu, S., et al. (2013). Dissociable endogenous and exogenous attention in  
759 disorders of consciousness. *Neuroimage Clin.* 3, 450-61.
- 760 24. Fernández-Espejo, D., and Owen, A.M. (2013). Detecting awareness after severe  
761 brain injury. *Nat. Rev. Neurosci.* 14, 801–9.
- 762 25. Bardin, J.C., et al. (2011). Dissociations between behavioural and functional  
763 magnetic resonance imaging-based evaluations of cognitive function after brain  
764 injury. *Brain* 134, 769–82.

- 765 26. Owen, A.M., et al. (2006). Detecting Awareness in the Vegetative State. *Science*.  
766 313, 1402–1402.
- 767 27. Schiff, N.D. (2016). Altered consciousness. In: Winn R, ed. *Youmans and Winn’s*  
768 *Neurological Surgery*. 7th ed. New York, NY: Elsevier Saunders. In press.
- 769 28. Naci, L., Cusack, R., Jia, V.Z., and Owen, A.M. (2013). The brain's silent  
770 messenger: using selective attention to decode human thought for brain-based  
771 communication. *The Journal of Neuroscience* 33(22), 9385-9393.
- 772 29. Haugg, A., Cusack, R., Gonzales-Lara, L., Sorger, B., Owen, A.M., Naci, L.  
773 (2018) Do patients thought to lack consciousness retain the capacity for internal  
774 as well external awareness? *Frontiers in Neurology*. In Press.
- 775 30. Naci, L., Sinai, L., and Owen, A.M. (2017). Detecting and interpreting conscious  
776 experiences in behaviorally non-responsive patients. *Neuroimage* 145(Pt B), 304–  
777 313.
- 778 31. Sinai L., Owen AM, Naci L. (2017) Mapping preserved real-world cognition in  
779 brain-injured patients. *Frontiers in Bioscience*. 22:815-823.
- 780 32. Naci, L., Cusack, R., Anello, M., and Owen, A.M. (2014). A common neural code  
781 for similar conscious experiences in different individuals. *Proc. Natl. Acad. Sci.*  
782 *U. S. A.* 111, 14277–82.
- 783 33. Fischer D.B., et al. (2016) A human brain network derived from coma-causing  
784 brainstem lesions. *Neurology*87(23):2427-2434.
- 785 34. Demertzi A., et al. (2015) Intrinsic functional connectivity differentiates  
786 minimally conscious from unresponsive patients. *Brain*. 2015 138(Pt 9):2619-31.

- 787 35. Demertzi A., et al. (2014) Multiple fMRI system-level baseline connectivity is  
788 disrupted in patients with consciousness alterations. *52*:35-46.
- 789 36. Soddu A., et al. (2011) Resting state activity in patients with disorders of  
790 consciousness. *Funct Neurol.* 26(1):37-43.
- 791 37. Soddu A., et al. (2009). Reaching across the abyss: recent advances in functional  
792 magnetic resonance imaging and their potential relevance to disorders of  
793 consciousness. *Prog Brain Res.* 177:261-74.
- 794 38. Vanhaudenhuyse A., et al. (2010) Default network connectivity reflects the level  
795 of consciousness in non-communicative brain-damaged patients. *Brain.* 2010  
796 Jan;133(Pt 1):161-71.
- 797 39. Boly M., et al. (2009). Functional connectivity in the default network during  
798 resting state is preserved in a vegetative but not in a brain dead patient. *Hum*  
799 *Brain Mapp.*30(8):2393-400.
- 800 40. Duncan, J. (2010). The multiple-demand (MD) system of the primate brain:  
801 mental programs for intelligent behaviour. *Trends Cogn. Sci.* 14, 172–179.
- 802 41. Elliot, R. (2003). Executive functions and their disorders. *Br Med Bull* 65:49-59.
- 803 42. Shallice T (1988) *From neuropsychology to mental structure* (Cambridge  
804 University Press).
- 805 43. Ptak, R. (2012). The Frontoparietal Attention Network of the Human Brain:  
806 Action, Saliency, and a Priority Map of the Environment. *Neurosci.* 18, 502–515.
- 807 44. Woolgar A., et al. (2010). Fluid intelligence loss linked to restricted regions of  
808 damage within frontal and parietal cortex. *Proc. Natl. Acad. Sci. USA* 107,  
809 14899-14902.

- 810 45. Barbey, A.K., et al. (2012). An integrative architecture for general intelligence  
811 and executive function revealed by lesion mapping. *Brain* 135, 1154–1164.
- 812 46. Hampshire A, Owen AM (2006) Fractionating attentional control using event-  
813 related fMRI. *Cereb Cortex* 16:1679-1689.
- 814 47. Sauseng P, Wolfgang Klimesch MS, Doppelmayr M (2005) Fronto-parietal EEG  
815 coherence in theta and upper alpha reflect central executive functions of working  
816 memory. *Int J Psychophysiol* 57:97-103.
- 817 48. Tononi, G., Boly, M., Massimini, M., and Koch, C. (2016). Integrated  
818 information theory: from consciousness to its physical substrate. *Nat rev Neurosci*  
819 17, 450-61.
- 820 49. Alkire, M.T., Hudetz, A.G., and Tononi, G. (2008). Consciousness and  
821 anesthesia. *Science* 322, 876–880.
- 822 50. Singer, W. (2001). Consciousness and the binding problem. *Ann N Y Acad Sci.*  
823 929, 123-46.
- 824 51. Hampshire, A., Highfield, R.R., Parkin, B.L., and Owen, A.M. (2012).  
825 Fractionating Human Intelligence. *Neuron* 76, 1225–1237.
- 826 52. Barttfeld, P., et al. (2015). Signature of consciousness in the dynamics of resting-  
827 state brain activity. *Proc. Natl. Acad. Sci.* 112, 887–892.
- 828 53. Stamatakis, E.A., Adapa, R.M., Absalom, A.R., & Menon, D.K. (2010). Changes  
829 in resting neural connectivity during propofol sedation. *PloS one* 5(12), e14224.
- 830 54. Sarasso, S., et al. (2015). Consciousness and Complexity during  
831 Unresponsiveness Induced by Propofol, Xenon, and Ketamine. *Curr Biol.* 25,  
832 3099-105.

- 833 55. Casali A. G. et al. (2013). A theoretically based index of consciousness  
834 independent of sensory processing and behavior. *Sci Transl Med.* 2013  
835 15(198):198ra105.
- 836 56. Massimini M, Ferrarelli F, Sarasso S, Tononi G. (2012) Cortical mechanisms of  
837 loss of consciousness: insight from TMS/EEG studies. *Arch Ital Biol.*150(2-3):44-  
838 55.
- 839 57. Wilf M. et al. (2016). Diminished Auditory Responses during NREM Sleep  
840 Correlate with the Hierarchy of Language Processing. *PLoS One.*  
841 11(6):e0157143.
- 842 58. Strauss M. et al. (2015). Disruption of hierarchical predictive coding during sleep.  
843 *Proc Natl Acad Sci U S A.* 112(11):E1353-62.
- 844 59. Pigorini A. et al. (2015). Bistability breaks-off deterministic responses to  
845 intracortical stimulation during non-REM sleep. *Neuroimage.* 112:105-13.
- 846 60. Boveroux, P., et al. (2010). Breakdown of within- and between-network resting  
847 state functional magnetic resonance imaging connectivity during propofol-  
848 induced loss of consciousness. *Anesthesiology* 113, 1038–1053.
- 849 61. Jordan, D., et al. (2013). Simultaneous electroencephalographic and functional  
850 magnetic resonance imaging indicate impaired cortical top-down processing in  
851 association with anesthetic-induced unconsciousness. *Anesthesiology* 119, 1031–  
852 1042.
- 853 62. Greicius, M.D., et al. (2008). Persistent default-mode network connectivity during  
854 light sedation. *Hum. Brain Mapp.* 29, 839-847.

- 855 63. Martuzzi, R., Ramani, R., Qiu, M., Rajeevan, N., and Constable, R.T. (2010).  
856 Functional connectivity and alterations in baseline brain state in humans.  
857 *Neuroimage* 49, 823–834.
- 858 64. Boly, M., et al. (2012). Connectivity Changes Underlying Spectral EEG Changes  
859 during Propofol-Induced Loss of Consciousness. *Journal of Neuroscience* 32,  
860 7082–7090.
- 861 65. Casarotto S. et al. (2016) Stratification of unresponsive patients by an  
862 independently validated index of brain complexity. *Ann Neurol.* 2016  
863 Nov;80(5):718-729.
- 864 66. Brown E.N., Lydic R, Schiff N.D. (2010). General anesthesia, sleep, and coma. *N*  
865 *Engl J Med.* 2010 Dec 30;363(27):2638-50.
- 866 67. Laureys S. (2005). The neural correlate of (un)awareness: lessons from the  
867 vegetative state. *Trends Cogn. Sci.* 9, 556.
- 868 68. Ku, S.W., Lee, U., Noh, G.J., Jun, I.G., Mashour, G.A. (2011). Preferential  
869 Inhibition of Frontal-to-Parietal Feedback Connectivity Is a Neurophysiologic  
870 Correlate of General Anesthesia in Surgical Patients. *PLoS ONE* 6, e25155.
- 871 69. Thibaut, A., et al. (2012). Metabolic activity in external and internal awareness  
872 networks in severely brain-damaged patients. *J. Rehabil. Med.* 44, 487–944.
- 873 70. Laureys, S., et al (2004). Brain function in the vegetative state. *Adv. Exp. Med.*  
874 *Biol.* 550, 229–238.
- 875 71. Seth, A.K., Izhikevich, E., Reeke, G.N., and Edelman, G.M. (2011). Theories and  
876 measures of consciousness: an extended framework. *Proc Natl Acad Sci USA.*  
877 103(28), 10799-804.



- 878 72. Corbetta, M., and Shulman, G.L. (2002). Control of goal-directed and stimulus-  
879 driven attention in the brain. *Nat. Rev. Neurosci.* 3, 201–215.
- 880 73. Kroger, J.K., et al. (2002). Recruitment of anterior dorsolateral prefrontal cortex  
881 in human reasoning: a parametric study of relational complexity. *Cerebral cortex*  
882 12(5), 477-485.
- 883 74. Hearne, L.J., Mattingley, J.B., and Cocchi, L. (2016). Functional brain networks  
884 related to individual differences in human intelligence at rest. *Sci Rep.* 6, 32328.
- 885 75. Barbey A. K. (2018). Network Neuroscience Theory of Human Intelligence.  
886 *Trends Cogn Sci.* 2018 22(1):8-20.
- 887 76. Ramsay, M., Savage, T., Simpson, B., and Goodwin, R. (1974). Controlled  
888 sedation with alphaxalone-alphadolone. *Br. Med. J.* 2(5920):656-9.
- 889 77. Marsh, B.M., White, M., Morton, N., and Kenny, G.N. (1991). Pharmacokinetic  
890 model driven infusion of propofol in children. *British journal of anaesthesia*  
891 67(1), 41-48.
- 892 78. Power, J. D., Barnes, K. A., Snyder, A. Z., Schlaggar, B. L., & Petersen, S. E.  
893 (2012). Spurious but systematic correlations in functional connectivity MRI  
894 networks arise from subject motion. *Neuroimage*, 59(3), 2142-2154.
- 895 79. Giacino, J. T., Kalmar, K., & Whyte, J. (2004). The JFK Coma Recovery Scale-  
896 Revised: measurement characteristics and diagnostic utility. *Archives of physical*  
897 *medicine and rehabilitation*, 85(12), 2020-2029.
- 898 80. Schnakers, C., et al. (2008). Cognitive function in the locked-in syndrome. *J.*  
899 *Neurol.* 255, 323-30.

- 900 81. Cusack, R., et al. (2015). Automatic analysis (aa): efficient neuroimaging  
901 workflows and parallel processing using Matlab and XML. *Frontiers in*  
902 *neuroinformatics* 8, 90.
- 903 82. Murphy, K., Birn, R. M., Handwerker, D. A., Jones, T. B., & Bandettini, P. A.  
904 (2009). The impact of global signal regression on resting state correlations: are  
905 anti-correlated networks introduced?. *Neuroimage*, 44(3), 893-905.
- 906 83. Anderson, J. S., Druzgal, T. J., Lopez-Larson, M., Jeong, E. K., Desai, K., &  
907 Yurgelun-Todd, D. (2011). Network anticorrelations, global regression, and  
908 phase-shifted soft tissue correction. *Human brain mapping*, 32(6), 919-934.
- 909 84. Raichle, M.E. (2011). The Restless Brain. *Brain Connect.* 1, 3–12.
- 910 85. van den Heuvel, M.P., and Pol, H.E.H. (2010). Exploring the brain network: A  
911 review on resting-state fMRI functional connectivity. *European*  
912 *Neuropsychopharmacology* 20(8), 519–534.
- 913 86. Smith, S.M., et al. (2011). Network modelling methods for FMRI. *Neuroimage*  
914 54, 875–891.
- 915 87. Ramsey, J.D. et al. (2010). Six problems for causal inference from fMRI.  
916 *Neuroimage* 49, 545–1558.
- 917

918 **Figures and Legends**

919

920 **Figure 1. Brain-wide inter-subject correlation of neural activity during the audio**

921 **story.** (A) The audio story elicited significant ( $p < 0.05$ ; FWE cor) inter-subject correlation

922 across the brain, including frontal and parietal cortex, thought to support executive

923 function. (B) The baseline elicited significant ( $p < 0.05$ ; FWE cor) inter-subject correlation

924 within primary and association auditory cortex. A small cluster was also observed in right

925 inferior prefrontal cortex. None was observed in dorsal prefrontal and parietal cortex. (C)

926 The audio story elicited significantly ( $p < 0.05$ ; FWE cor) more inter-subject correlation

927 than the auditory baseline derived from the same stimulus, in parietal, temporal, motor,

928 and dorsal/ventral frontal/prefrontal cortex. A, B, C, adapted with permission from Naci

929 et al. (2017) (30). (D) The audio story elicited significant ( $p < 0.05$ ; FWE cor) inter-subject

930 correlation across the brain, including frontal and parietal cortex, in the wakeful state of

931 the anesthesia study. (E) In the deep anesthesia state, significant ( $p < 0.05$ ; FWE cor) inter-

932 subject correlation was limited to the auditory cortex with the exception of two small

933 clusters, one in left prefrontal and the other in right parietal cortex. (F) The intact audio

934 story elicited significantly ( $p < 0.05$ ; FWE cor) more cross-subject correlation than the

935 scrambled story bilaterally in temporal, ventral prefrontal and frontal cortex, and further

936 in parietal, motor, and dorsal frontal and prefrontal cortex in the right hemisphere.

937 Warmer colors depict higher t-values of cross-subject correlation. Warmer colors depict

938 higher t-values of inter-subject correlation.

939 **Figure 2. Candidate patterns of connectivity perturbations caused by deep propofol**  
940 **anesthesia.** (A) Loss of long-range connectivity between different networks; (B) Loss of  
941 long-range connectivity within a specific network, e.g., between frontal and parietal  
942 regions; (C) A combination of patterns in A and B; (D) Loss of functional differentiation  
943 between different brain networks.

944 **Figure 3. Global *within-* and *between-*network functional connectivity perturbations**  
945 **by deep propofol anesthesia (A–D)** Functional connectivity matrices for five brain  
946 networks in the story and resting state conditions, in the wakeful and deep anesthesia  
947 states. Each cell represents the correlation of the time-course of one region of interest  
948 (ROI) with another, or itself (in the center diagonal). Cells representing correlations of  
949 ROIs within each network are delineated by red squares. Warm/cool colors represent  
950 high/low correlations, as shown in heat-bar scale. (E) Average connectivity (z values)  
951 *within-* and *between-* networks in the wakeful (W) and the deep anesthesia (D) states,  
952 during the story and resting state conditions. DMN/DAN/ECN/VIS/AUD=Default  
953 Mode/Dorsal Attention/Executive Control/Visual/Auditory network.

954 **Figure 4. Perturbations of auditory and fronto-parietal connectivity by deep**  
955 **propofol anesthesia in the audio story condition.** Only connectivity *between* the AUD  
956 and DAN/ECN, respectively, was significantly modulated by propofol, showing a  
957 significant reduction of functional differentiation between sensory and higher-order  
958 networks in deep anesthesia relative to wakefulness. (A–B) Functional connectivity  
959 matrices for ROIs comprising the DAN and AUD (A)/ECN and AUD (B) networks in the  
960 wakeful and deep anesthesia states of the audio story condition. (C–D) Average  
961 connectivity (z-values) *within* and *between* the DAN and AUD (C)/ECN and AUD (D),  
962 in the wakeful and deep anesthesia states.

963 **Figure 5. Functional connectivity between the auditory and fronto-parietal networks**  
964 **in healthy wakeful individuals, during the audio story and baseline conditions.**

965 Connectivity between the auditory and fronto-parietal networks was significantly  
966 modulated by the presence of complex meaningful stimuli, with the functional  
967 differentiation between the AUD and DAN/ECN increasing significantly in the audio  
968 story as compared to the scrambled story and resting state baseline conditions. (A–C)  
969 Connectivity between the ROIs within the AUD and DAN networks in the intact story  
970 (A), scrambled story (B), and resting state (C) baseline. (D) Average AUD–DAN  
971 connectivity (z values) for each condition. (E–G) Connectivity between the ROIs within  
972 the AUD and ECN networks in the intact story (E), scrambled story (F), and resting state  
973 (G) baseline. (H) Average AUD–ECN connectivity (z values) for each condition. A1:  
974 Primary auditory cortex; LFEF: Left frontal eye field; RFEF: Right frontal eye field;  
975 LPIPS: Left posterior IPS; RPIPS: Right posterior IPS; LAIPS Left anterior IPS; RAIPS:  
976 Right anterior IPS LMT: Left middle temporal area; RMT: Right middle temporal area;  
977 DMPFC: Dorsal medial PFC; LAPFC: Left anterior prefrontal cortex; RAPFC: Right  
978 anterior prefrontal cortex LSP: Left superior parietal; RSP: Right superior parietal.

979 **Figure 6. Summary of DoC patients' clinical and fMRI assessment data.** *Auditory*  
980 *processing.* In the fMRI assessment, three patients clinically diagnosed to be in a VS did  
981 not show evidence of auditory processing. The other eight patients who showed evidence  
982 of auditory processing, two patients clinically diagnosed as VS did not show evidence of  
983 brain-based command-following, and the other six, including two diagnosed as VS,  
984 showed evidence of brain-based command-following, and thus, of covert awareness.  
985 *Command-following.* 6/11 patients followed task commands by willfully modulating  
986 their brain activity as requested, and thus, provided evidence of conscious awareness.  
987 Two of these (P2, P5) presented a CMD profile, or a behavioral diagnosis of VS that was  
988 inconsistent with their positive fMRI results. 5/11 patients showed no evidence of willful  
989 responses in the fMRI command-following task, and, thus, provided no neuroimaging  
990 evidence of awareness. One (P7) showed no neuroimaging evidence of awareness despite  
991 an MCS diagnosis, due to falling asleep in the scanner for the entirety of the session  
992 (Materials and Methods).



993 **Figure 7. Modulation of auditory to fronto-parietal connectivity by meaningful**  
994 **stimulation in DoC patients.** Similarly to healthy individuals, connectivity between the  
995 auditory and fronto-parietal networks in DoC+ patients was significantly modulated by  
996 the presence of complex meaningful stimuli, with the functional differentiation between  
997 the AUD and DAN/ECN increasing significantly in the audio story as compared to the  
998 resting state baseline condition. (A–D) Connectivity between the ROIs within the AUD  
999 and DAN networks, during the audio story and resting state baseline, in the DoC+ (A–B)  
1000 and DoC- (C–D) patients. (E) Differential averaged AUD–DAN connectivity (z values)  
1001 for each patient group. (F) Differential averaged AUD–DAN connectivity (z values) for  
1002 each individual patient. (G–J) Connectivity between the ROIs within the AUD and ECN  
1003 networks, during the audio story and resting state baseline, in the DoC+ (G–H) and DoC-  
1004 (I–J) patients. (K) Differential averaged AUD–ECN connectivity (z values) for each  
1005 patient group. (L) Differential averaged AUD–ECN connectivity (z values) for each  
1006 individual patient. A1: Primary auditory cortex; LFEF: Left frontal eye field; RFEF:  
1007 Right frontal eye field; LPIPS: Left posterior IPS; RPIPS: Right posterior IPS; LAIPS  
1008 Left anterior IPS; RAIPS: Right anterior IPS LMT: Left middle temporal area; RMT:  
1009 Right middle temporal area; DMPFC: Dorsal medial PFC; LAPFC: Left anterior  
1010 prefrontal cortex; RAPFC: Right anterior prefrontal cortex LSP: Left superior parietal;  
1011 RSP: Right superior parietal.

1012 **Figure 8. The relationship between brain network connectivity during the audio**  
1013 **story and independently-measured cognitive performance.** The functional  
1014 connectivity between AUD and DAN, but not ECN (or DMN, used here as a high-level  
1015 control network) during the story, and not the resting state baseline condition, was  
1016 significantly inversely related to verbal performance. (A) Group-averaged correlation  
1017 between the functional connectivity (FC) of the AUD and the DMN/DAN/ECN networks  
1018 during the audio story and resting state conditions and verbal performance. (B–C) For  
1019 each participant, the correlation between their AUD–DAN (B)/AUD–ECN (C)  
1020 connectivity during the story and their verbal performance is displayed.

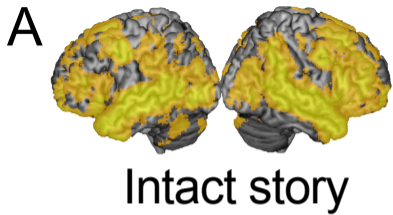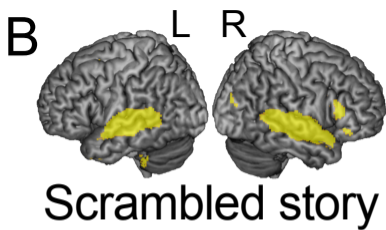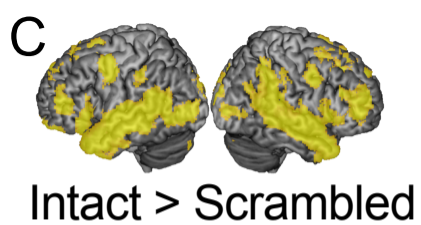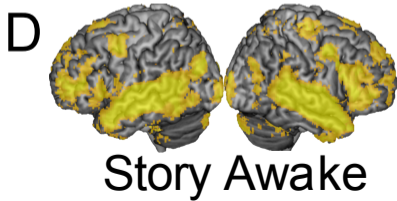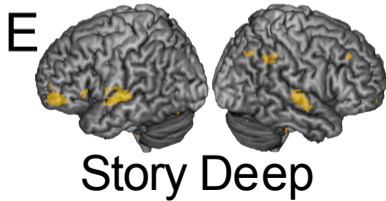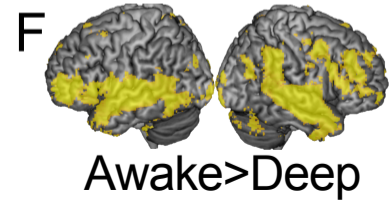

**A**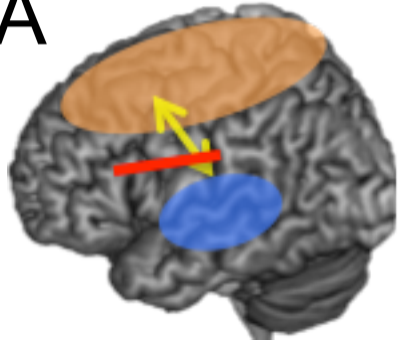**B**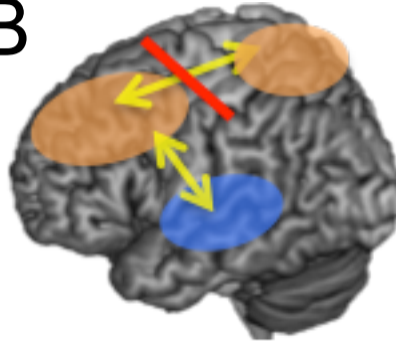**C**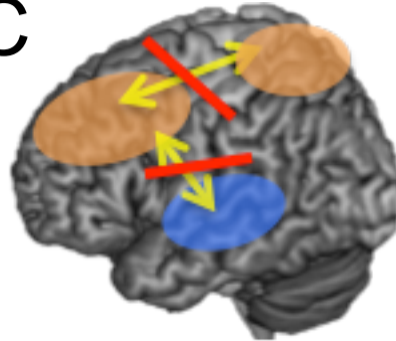**D**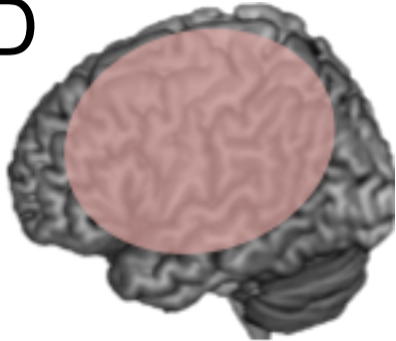

# Audio Story

# Resting

A

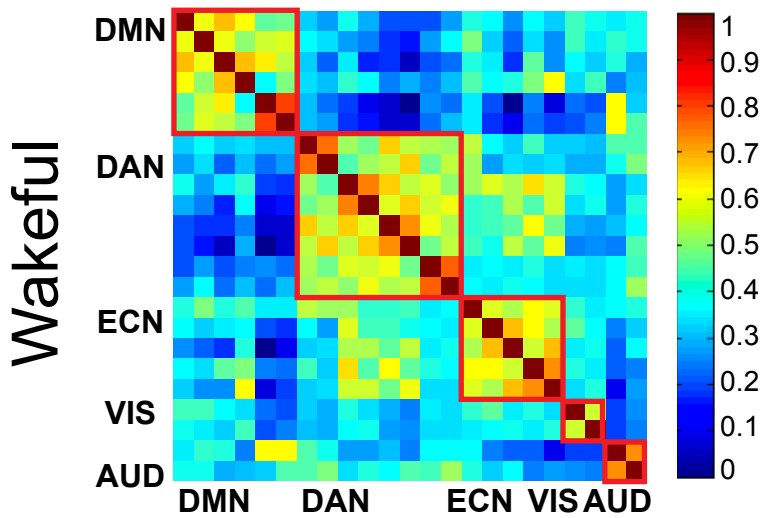

C

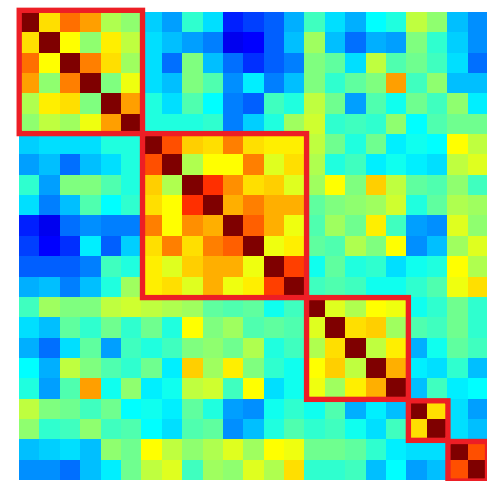

B

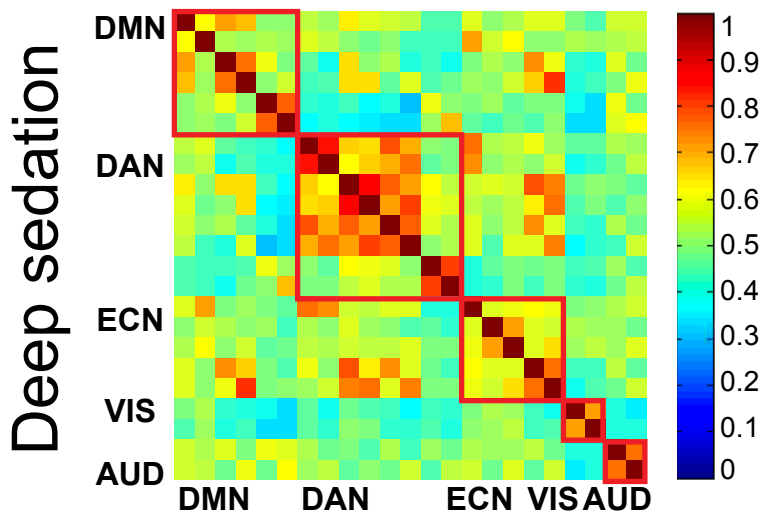

D

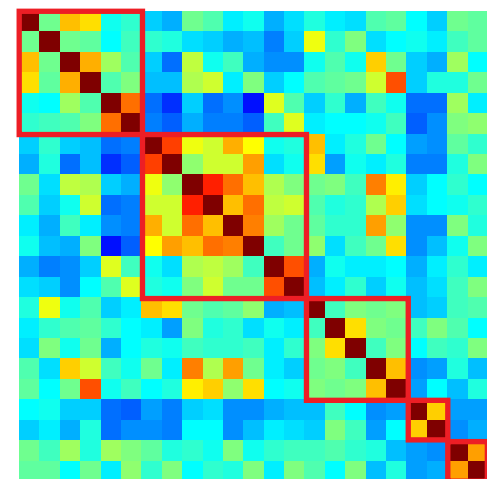

E

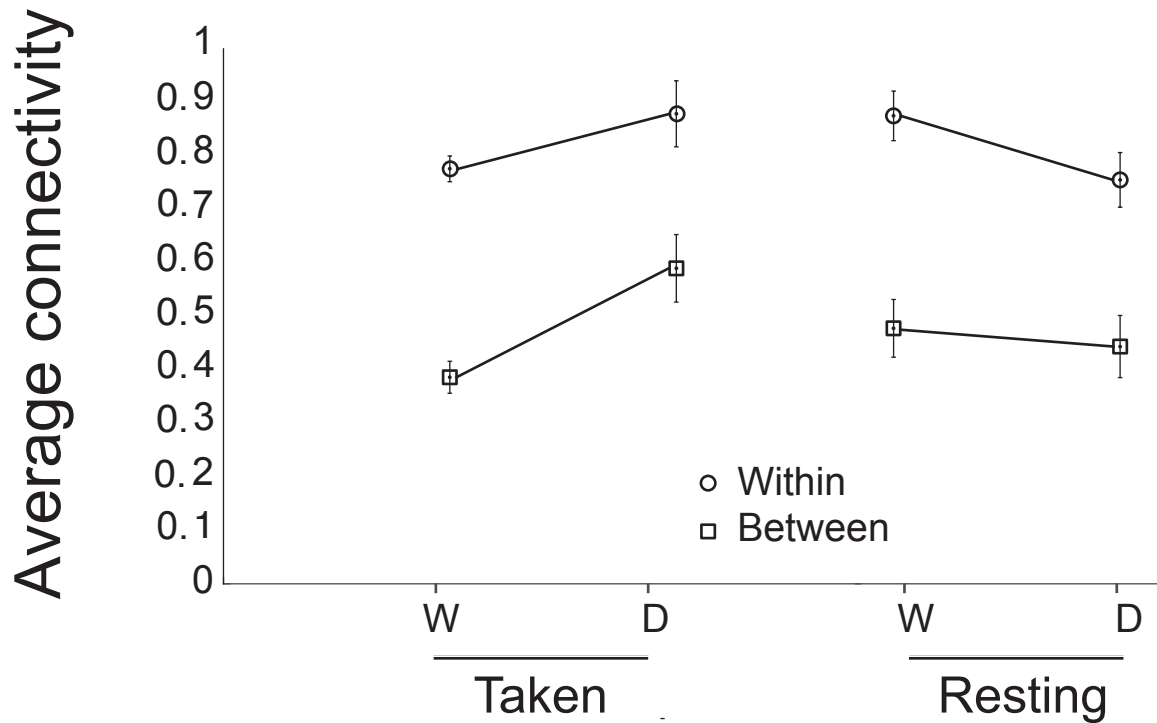

# AUD-DAN Connectivity

# AUD-ECN Connectivity

Audio Story

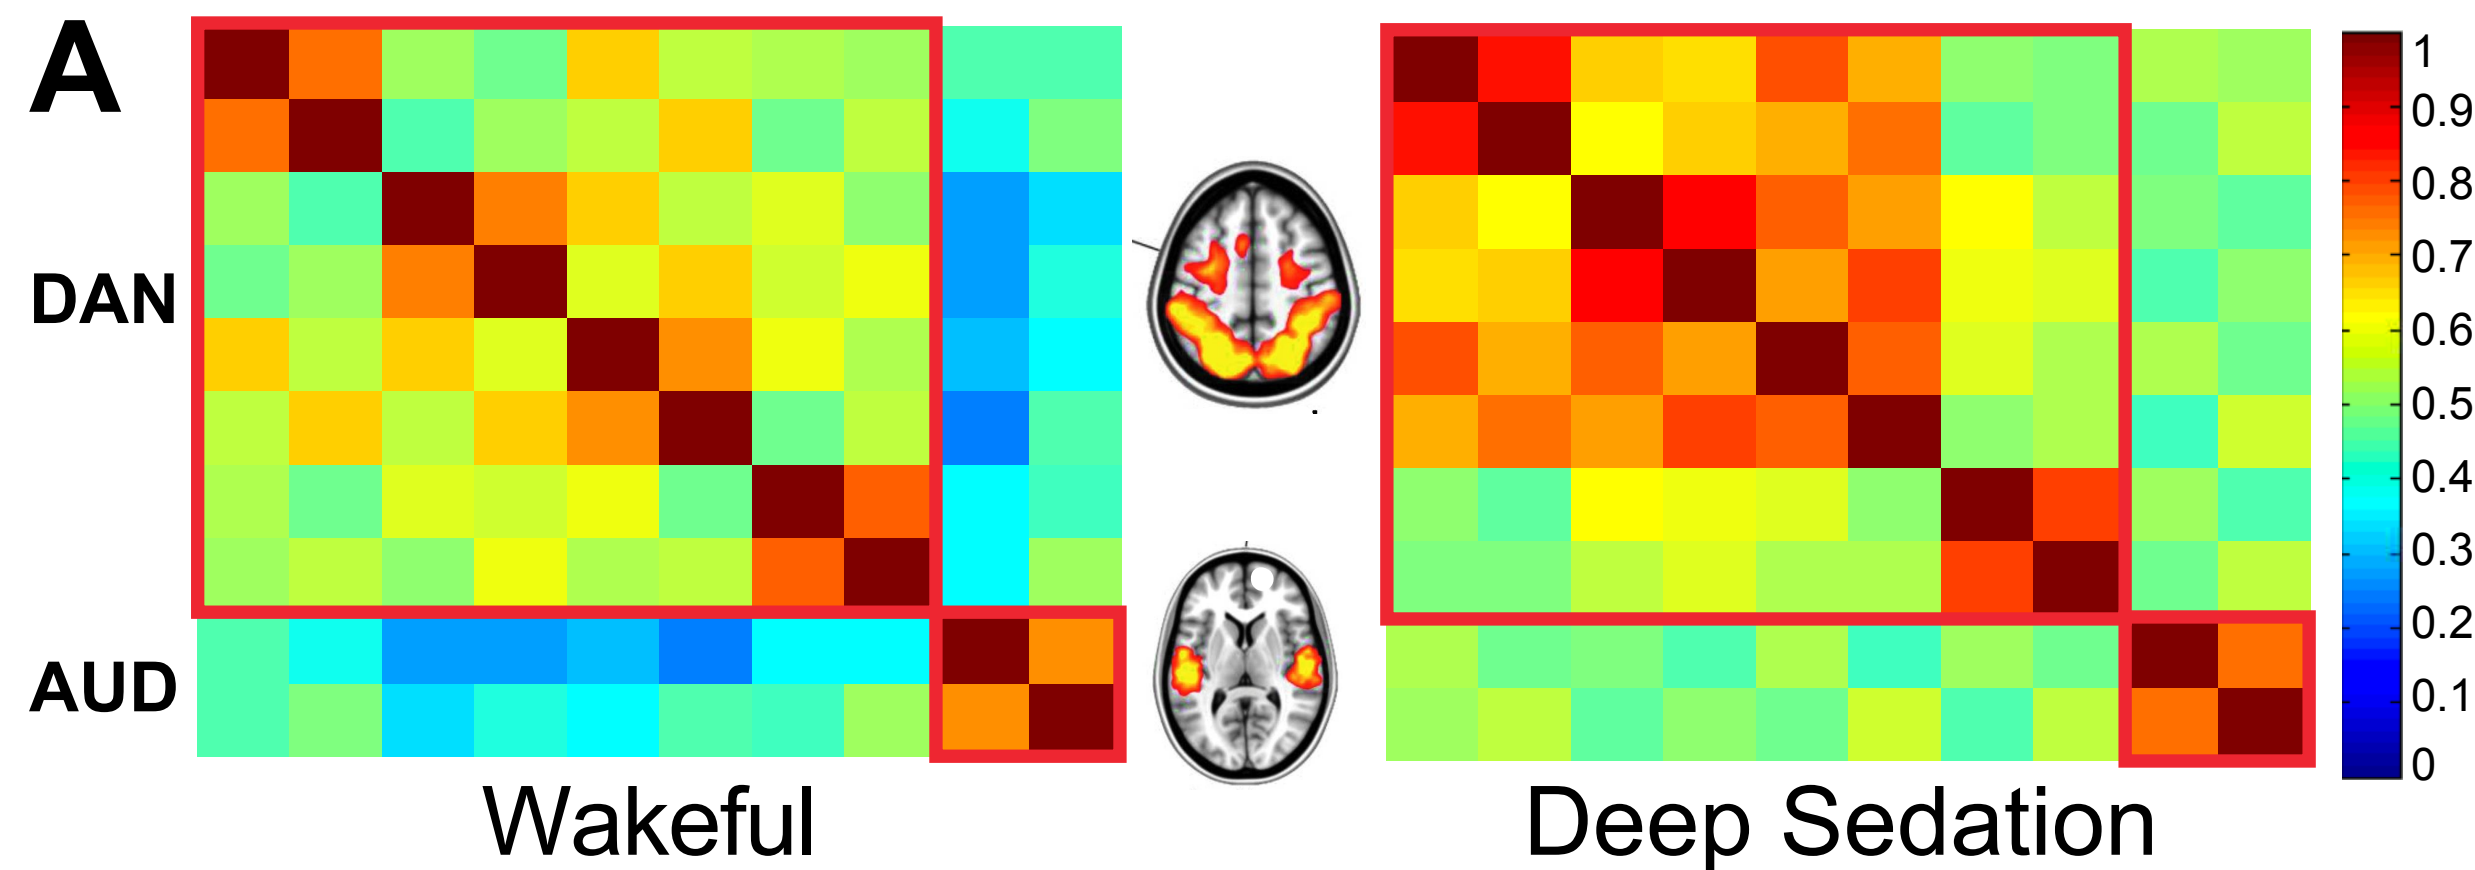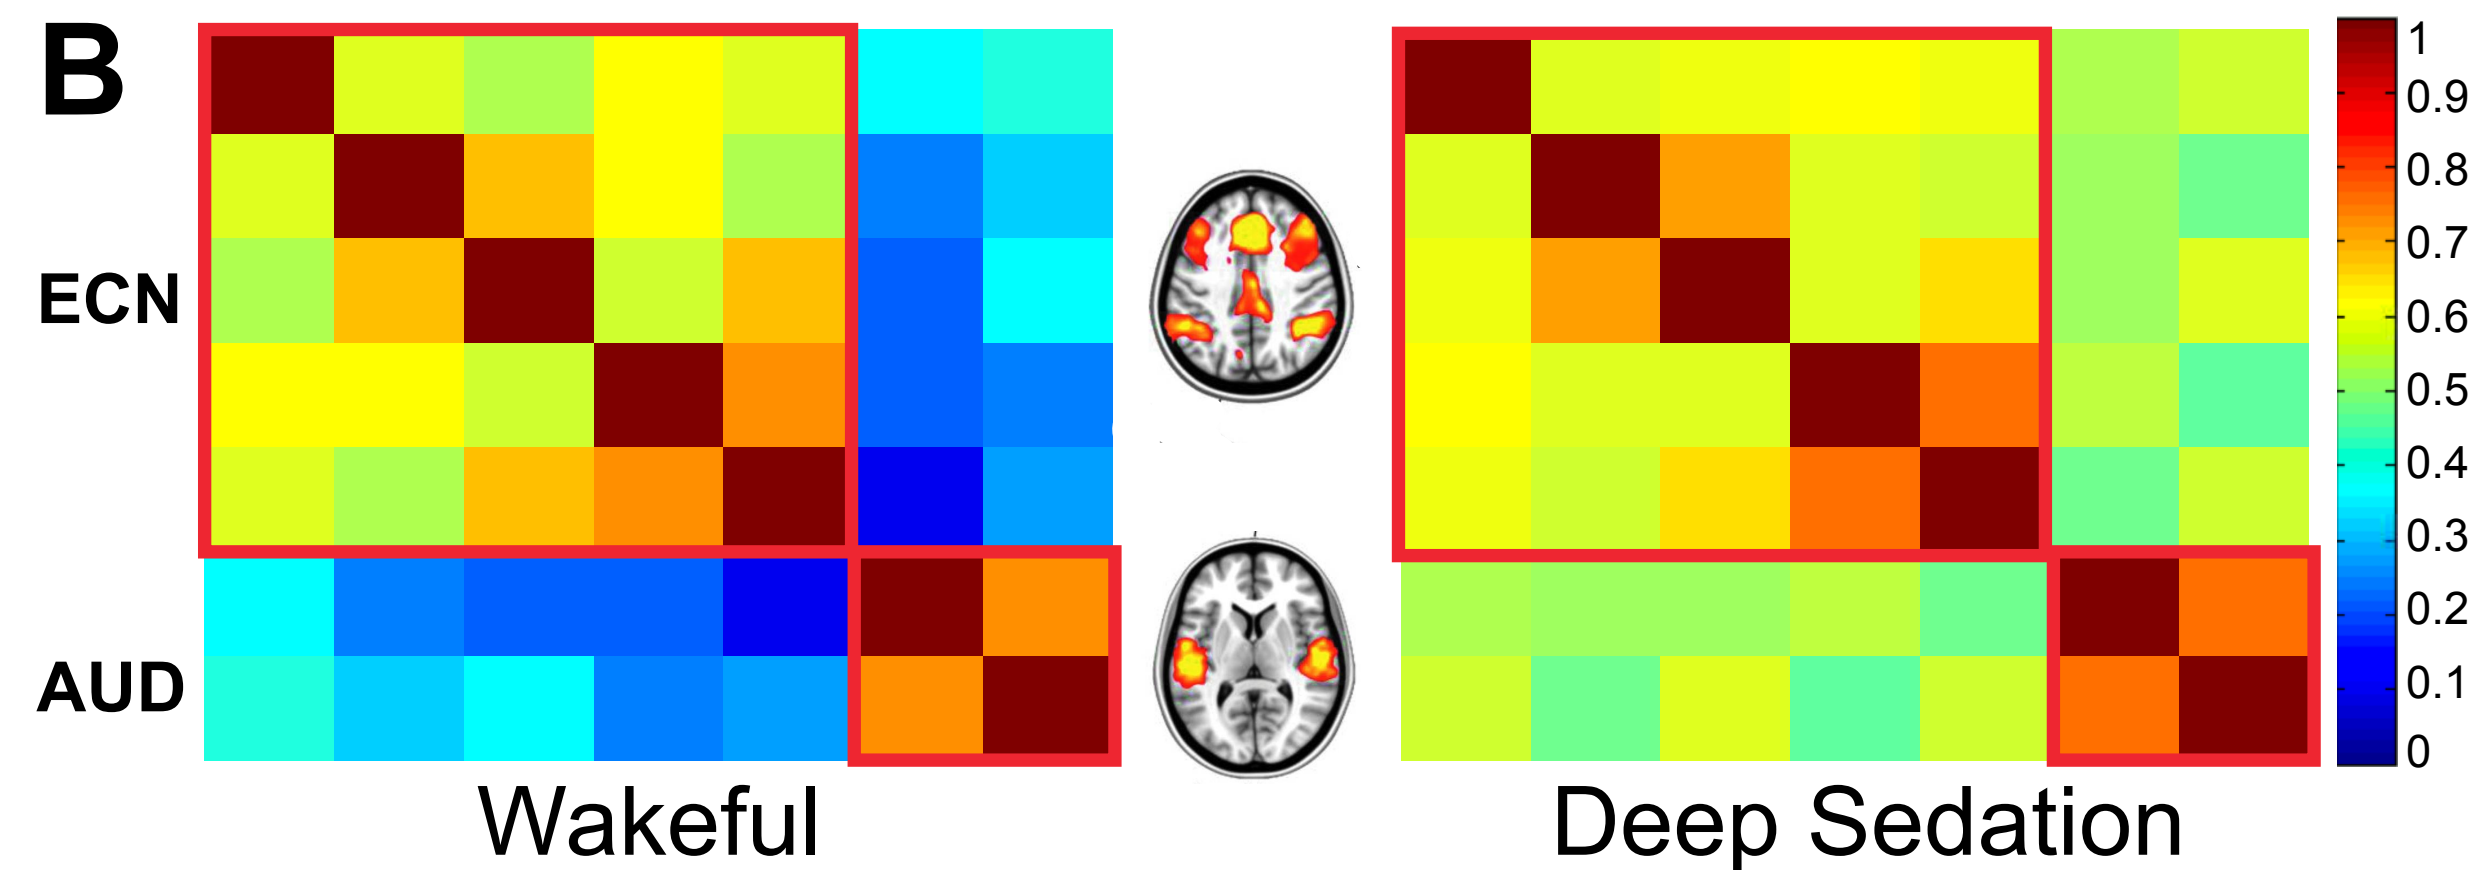

Audio Story

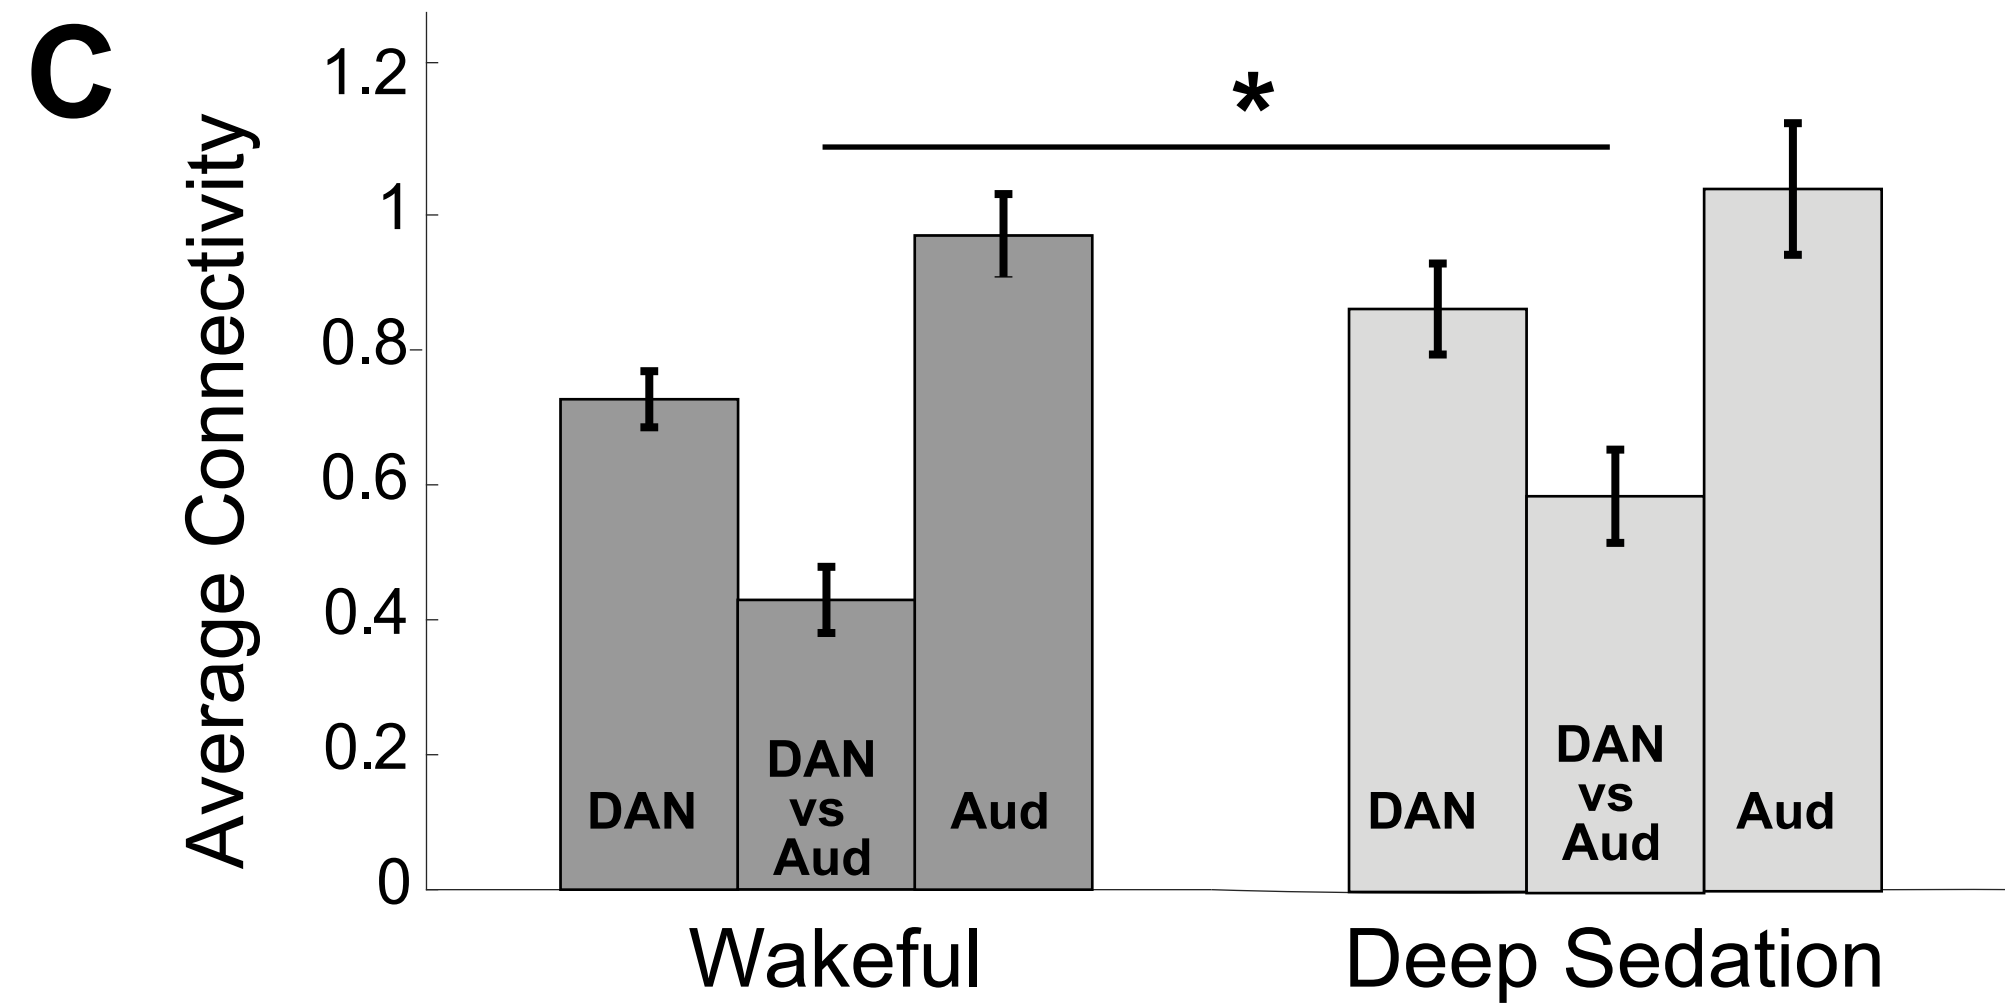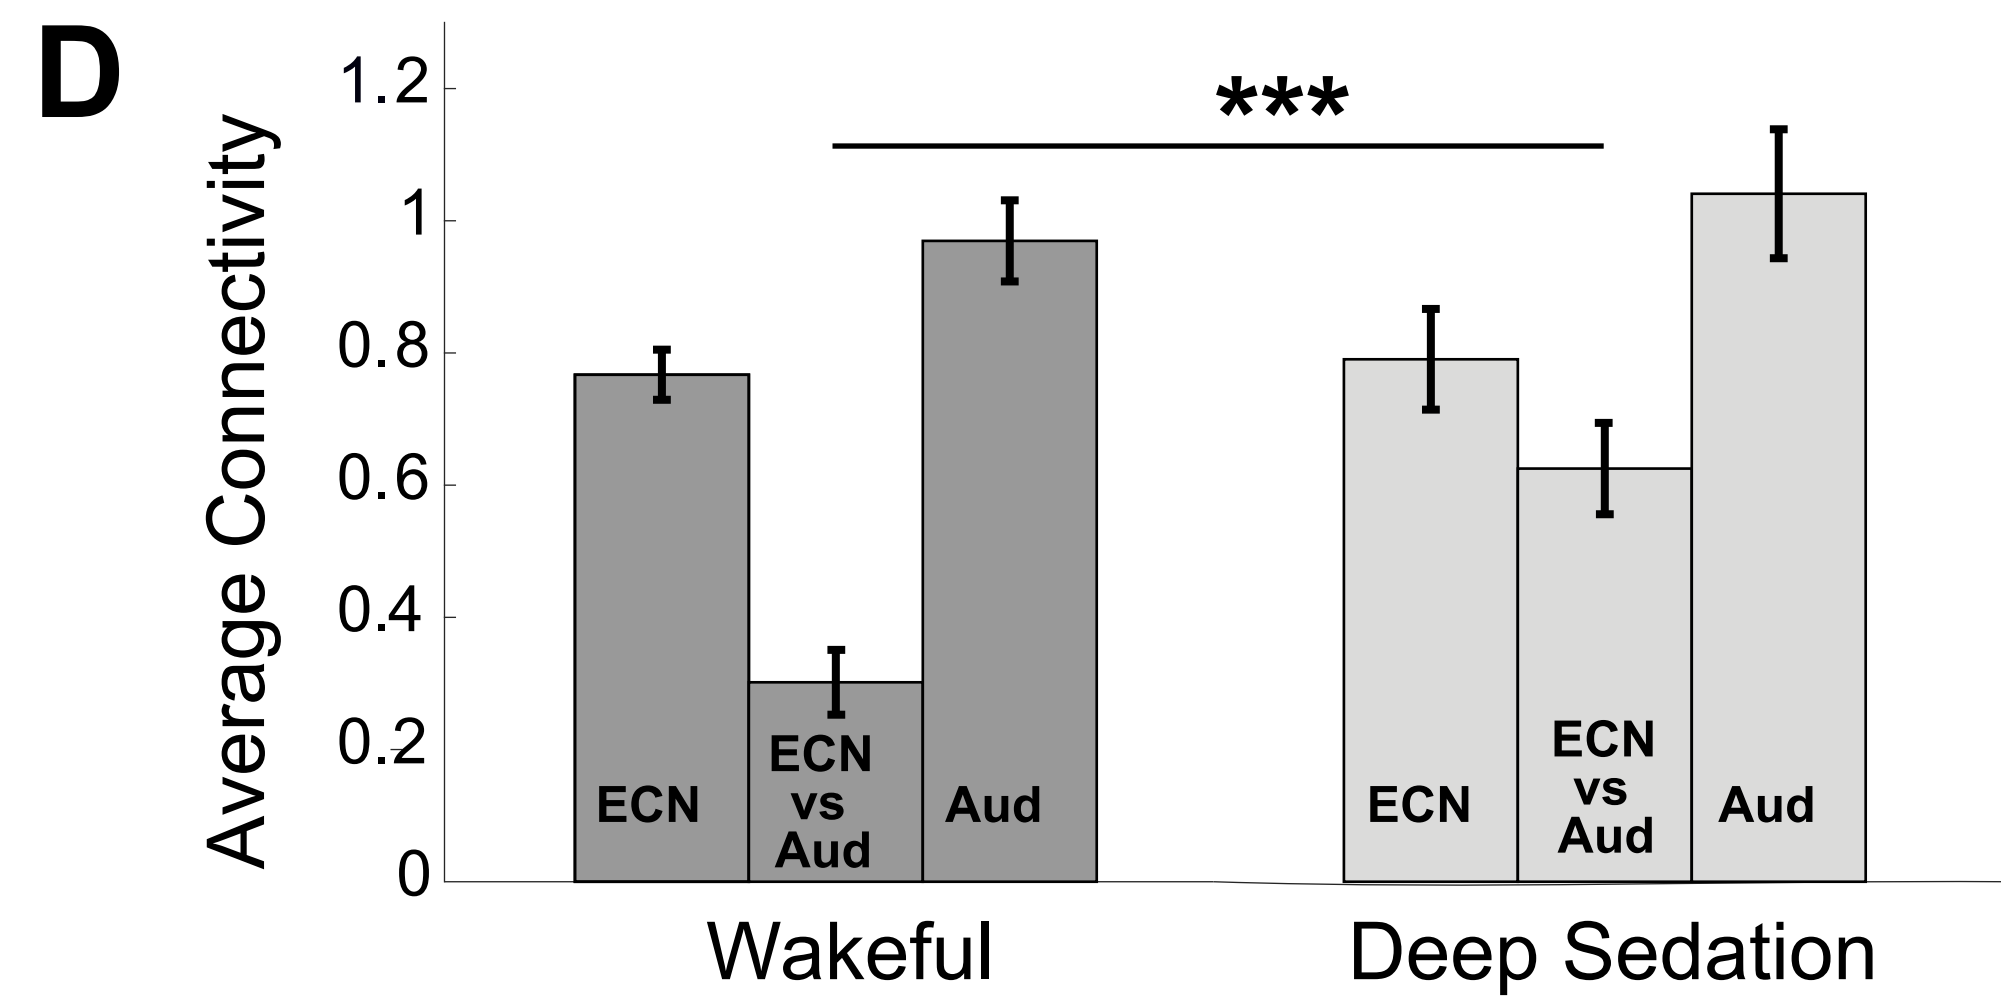

# AUD-DAN

ROI Connectivity

## Intact Story

## Scrambled Story

## Resting State

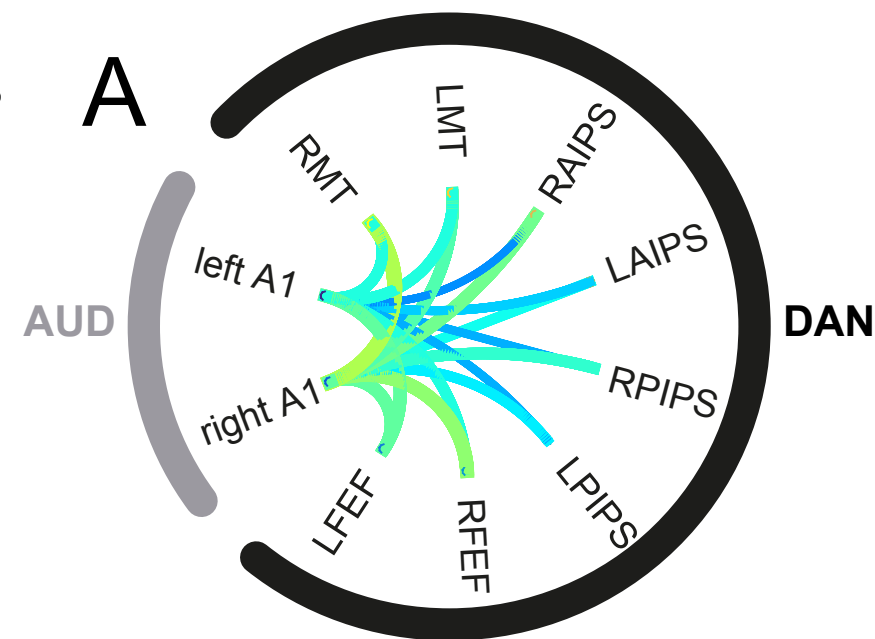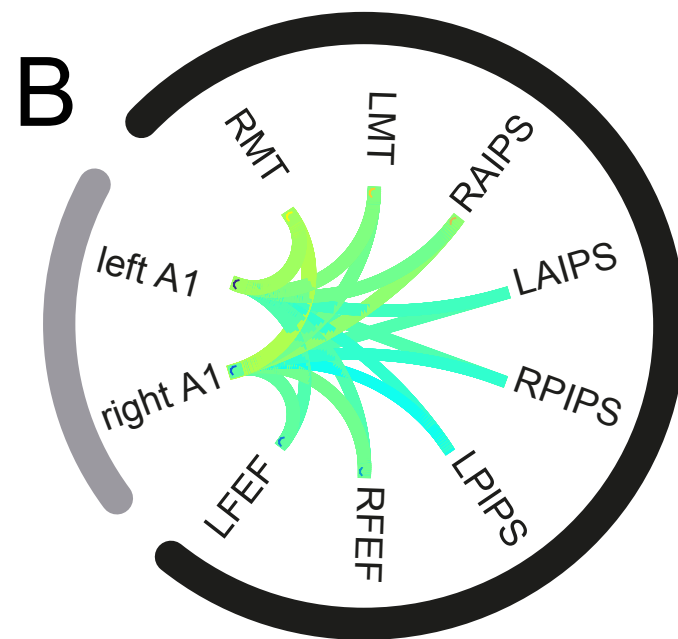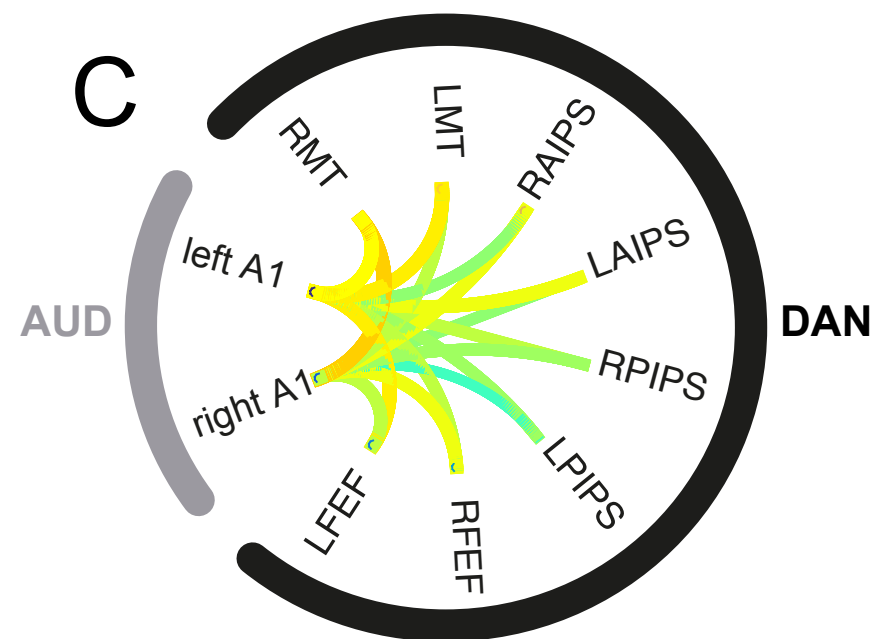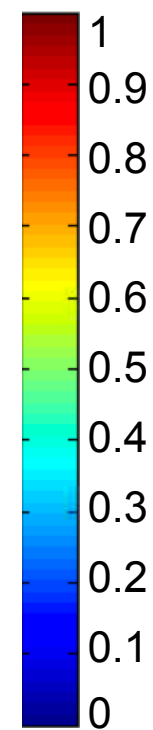

**D**

Average Connectivity

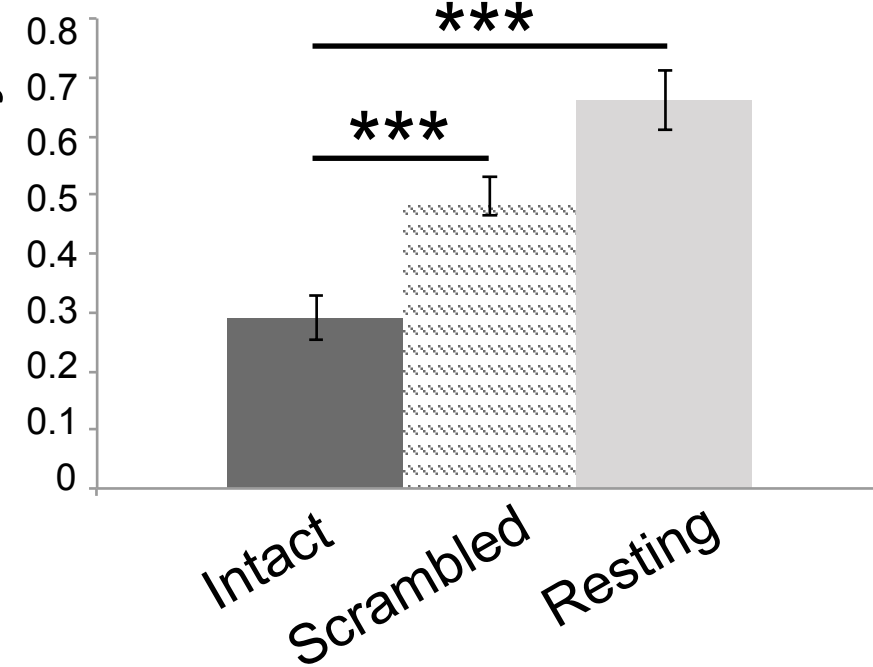

# AUD-ECN

ROI Connectivity

**E**

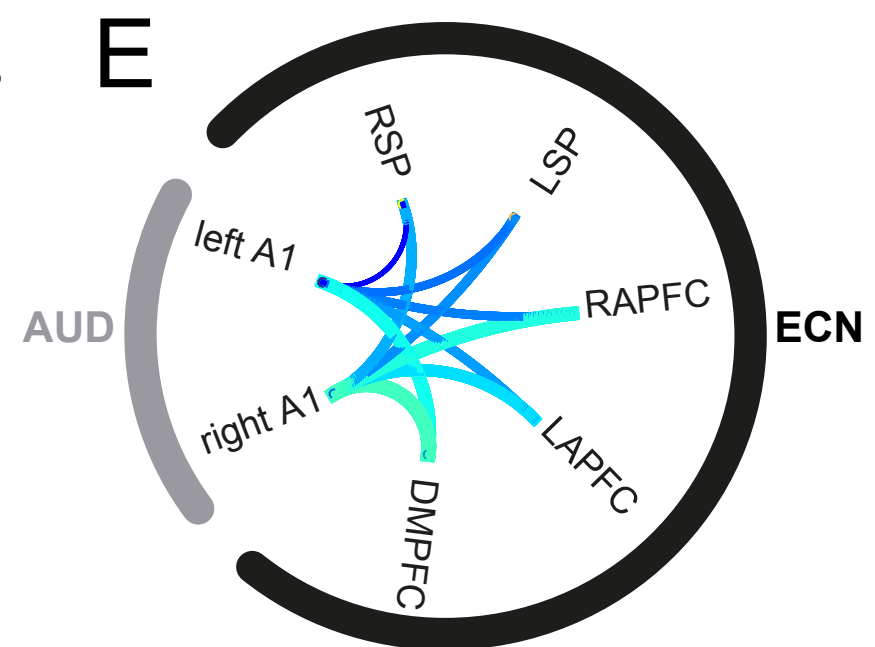

**F**

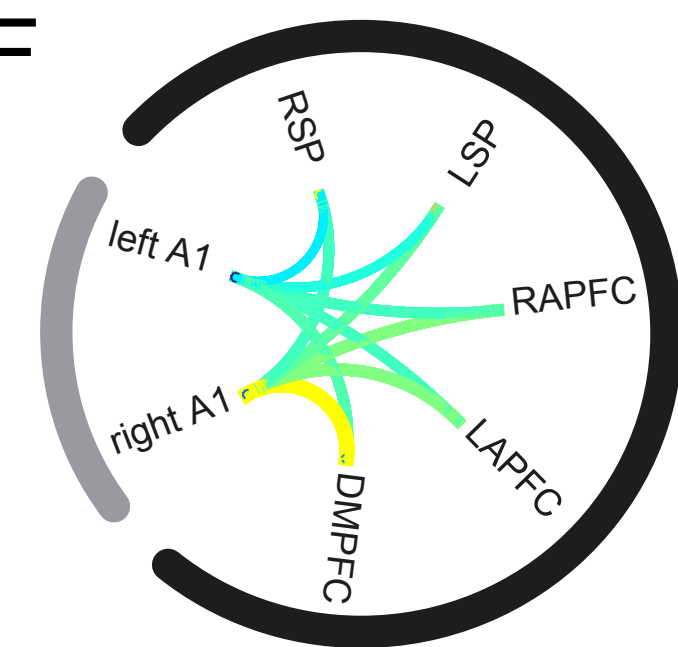

**G**

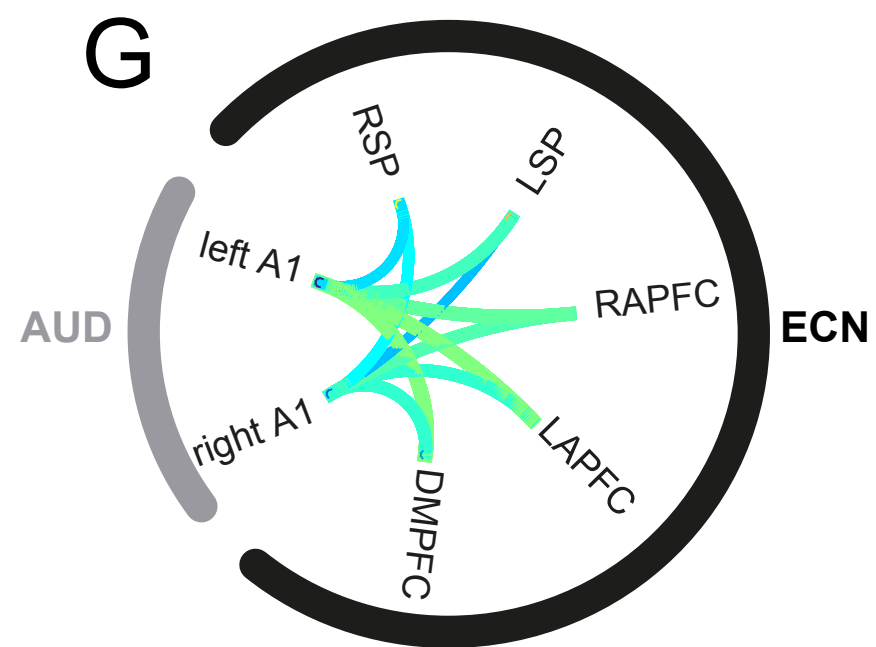

**H**

Average Connectivity

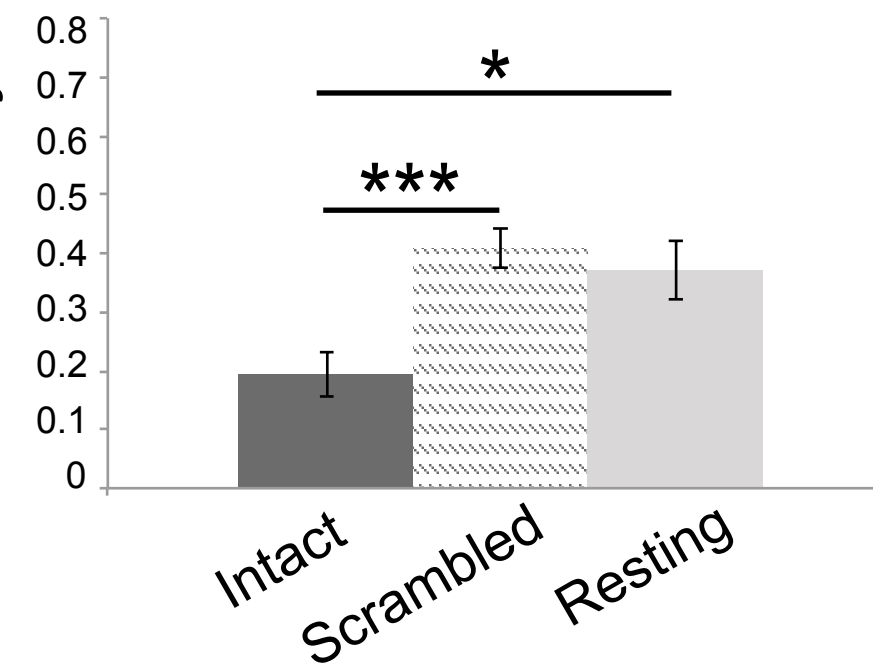

| Participant   | Diagnosis | Behavior                                               |                     | Imaging                                                                               |                                                                                         |
|---------------|-----------|--------------------------------------------------------|---------------------|---------------------------------------------------------------------------------------|-----------------------------------------------------------------------------------------|
|               |           | Highest voluntary response                             | Movement to command | Auditory Processing                                                                   | Command-following                                                                       |
| Healthy Group | N/A       | Communication                                          | Yes                 | 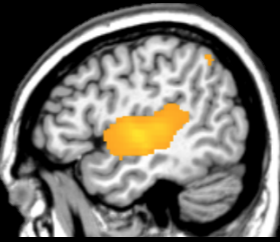   |      |
| P1            | VS        |                                                        | No                  |    | L    |
| P2            | VS        |                                                        | No                  |    | L    |
| P3            | MCS       | Visual pursuit                                         | No                  |   | R   |
| P4            | VS        |                                                        | No                  |  | L  |
| P5            | VS        |                                                        | No                  |  | R  |
| P6            | MCS       | Visual pursuit                                         | No                  |  | L  |
| P7            | MCS       | Object localization: reaching (asleep during scanning) | Yes                 |  | L  |
| P8            | VS        |                                                        | No                  |  | L  |
| P9            | VS        |                                                        | No                  |  | L  |
| P10           | MCS       | Visual pursuit                                         | No                  |  | L  |
| P11           | LIS       | Communication                                          | Yes                 |  | L  |

<https://doi.org/10.1101/336859>



# AUD-DAN Connectivity

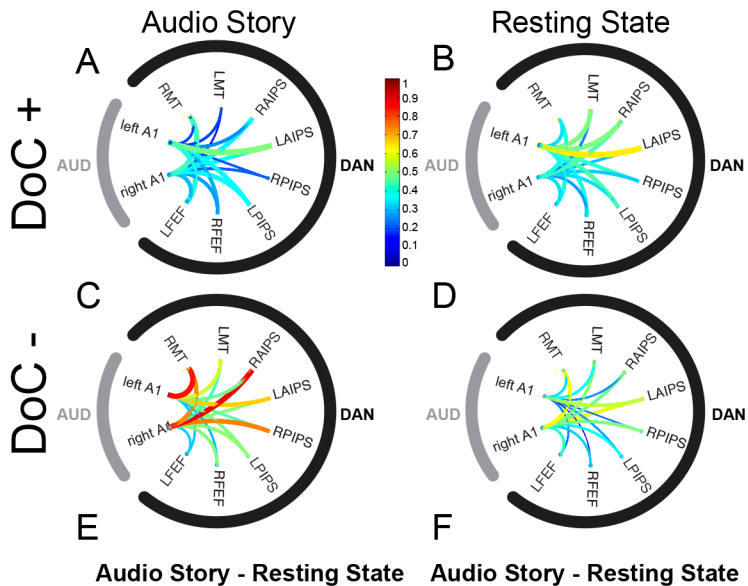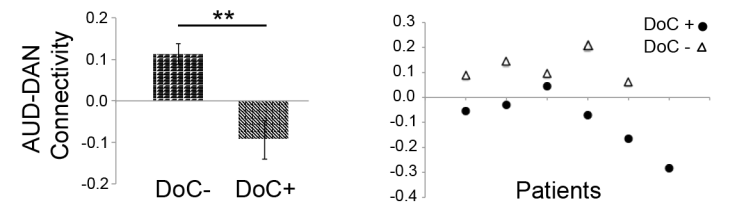

# AUD-ECN Connectivity

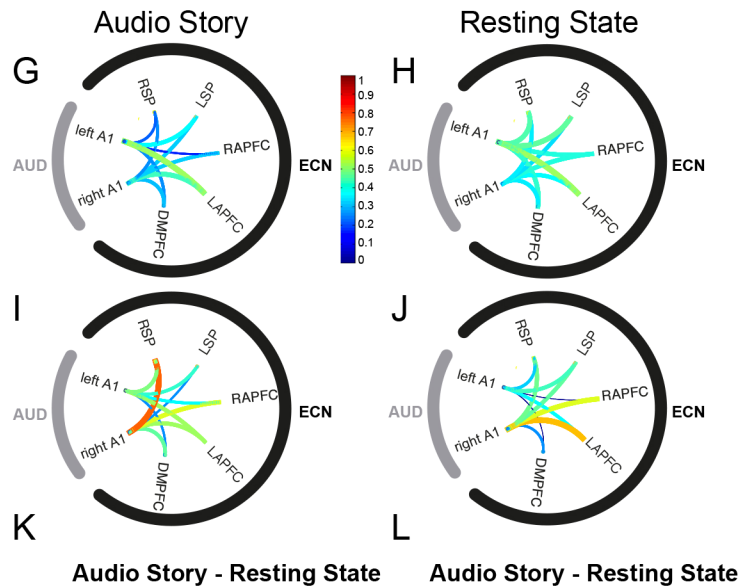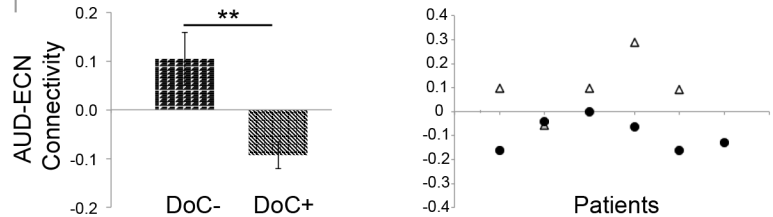

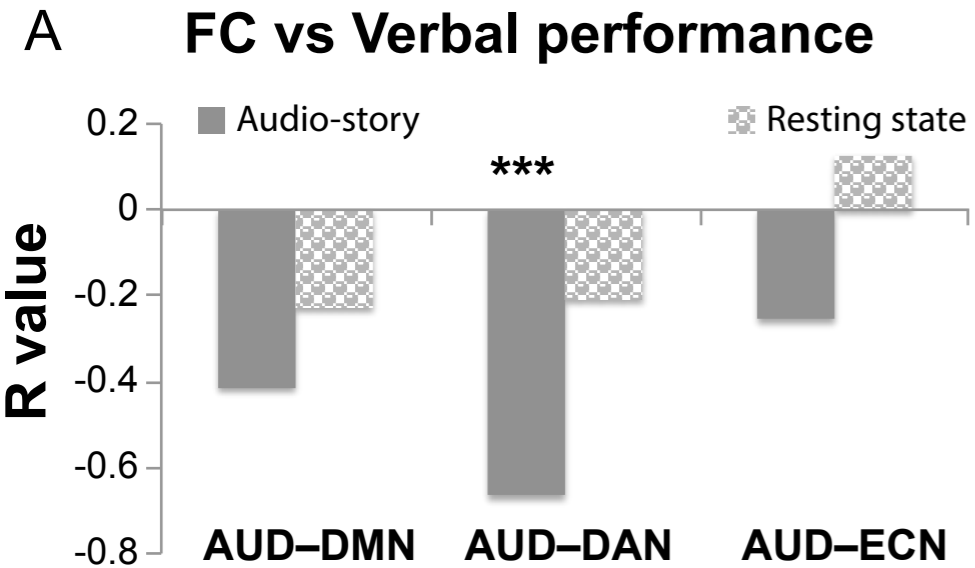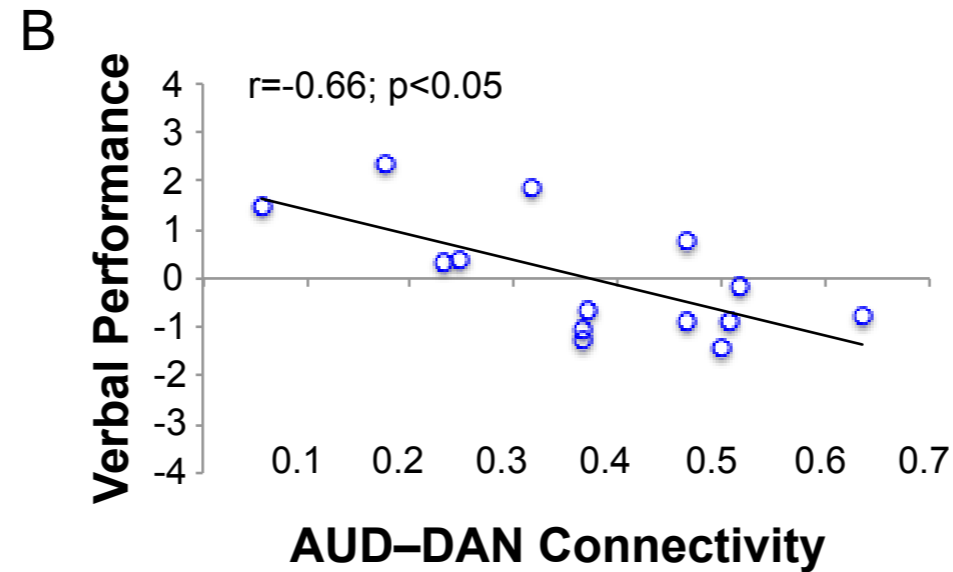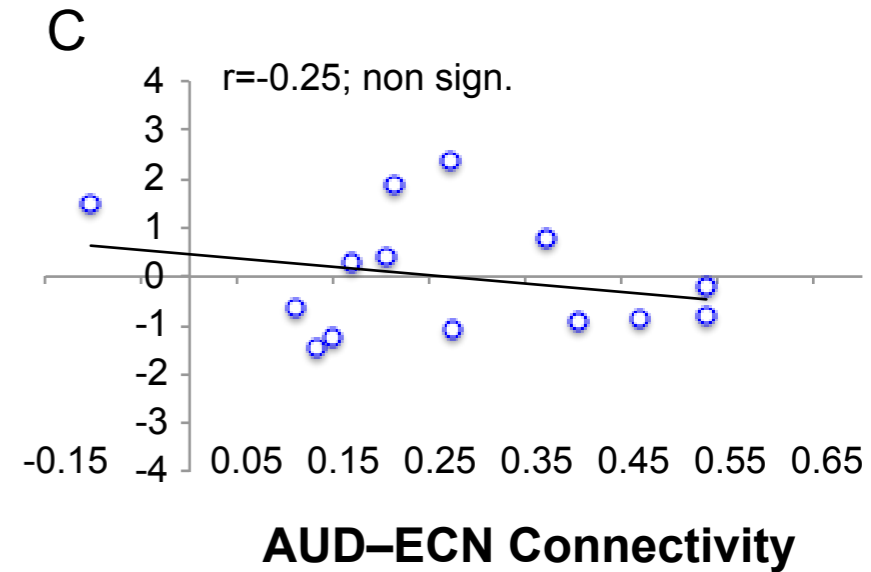

Source: http://biorxiv.org/content/10.1101/336859v1.full.pdf
